# Supplementary material for: Fruit-feeding butterfly diversity in a large city in southern India
Source: Research Square preprint supplement (doi:10.21203/rs.3.rs-7740235/v1), 2025-10-29
Supplement: Supplementary file 1 [file f5d0ea8c95fe86c590ef3163.xlsx]

## Sheet: Data
Individual code	Background	Date	Site	Species	Photo	ExtraPhoto	comments
PM85	grey card	2018-03-01	Pongumoodu	?	DSC_1713
PM724	wild	2017-01-20	Pongumoodu	?	DSC_5916	DSC_5915	bad photo
TP83	grey card	2017-06-07	Technopark	?	?
TP430	grey card	2017-03-09	Technopark	?	DSC_6861	DSC_6860-6859-6854	not fruit-feeding
TP754	grey card	2017-12-21	Technopark	?	DSC_0637
TP793	grey card	2017-12-21	Technopark	?	DSC_0590
TP1038	grey card	2017-07-24	Technopark	?	DSC_9344	From DSC_9343 to DSC_9339
TP1208	grey card	2017-01-25	Technopark	?	DSC_6135
TP1278	grey card	2017-08-25	Technopark	?	DSC_9891
TP1301	grey card	2017-08-25	Technopark	?	DSC_9865
TP1343	wild	2017-08-25	Technopark	?	DSC_9806	From DSC_9805 To DSC_9801
TP1448	grey card	2017-08-26	Technopark	?	DSC_0117
TP569	wild	2017-04-12	Technopark	Acraea issoria	DSC_7550	From DSC_7549-7545
PM678	wild	2016-06-19	Pongumoodu	Acraea terpsicore	DSC_4287	DSC_4286-4284-4283-4282
PM907	wild	2017-02-22	Pongumoodu	Acraea terpsicore	DSC_6621		tawny coster
PM104	grey card	2018-03-01	Pongumoodu	Ariadne ariadne	DSC_1689
PM120	grey card	2018-03-01	Pongumoodu	Ariadne ariadne	DSC_1665
PM143	grey card	2016-08-02	Pongumoodu	Ariadne ariadne	DSC_4574
PM192	grey card	2017-02-02	Pongumoodu	Ariadne ariadne	DSC_6391
PM197	grey card	2017-02-02	Pongumoodu	Ariadne ariadne	DSC_6380
PM205	grey card	2017-02-02	Pongumoodu	Ariadne ariadne	DSC_6364
PM206	grey card	2017-02-02	Pongumoodu	Ariadne ariadne	DSC_6363
PM211	grey card	2017-02-02	Pongumoodu	Ariadne ariadne	DSC_6352
PM261	grey card	2016-08-03	Pongumoodu	Ariadne ariadne	DSC_4596
PM269	grey card	2017-06-03	Pongumoodu	Ariadne ariadne	DSC_8723
PM293	grey card	2016-10-05	Pongumoodu	Ariadne ariadne	DSC_0176
PM295	grey card	2016-10-05	Pongumoodu	Ariadne ariadne	DSC_0174
PM296	grey card	2016-10-05	Pongumoodu	Ariadne ariadne	DSC_0173
PM297	grey card	2016-10-05	Pongumoodu	Ariadne ariadne	DSC_0172
PM313	grey card	2016-10-05	Pongumoodu	Ariadne ariadne	DSC_0142
PM332	grey card	2016-10-04	Pongumoodu	Ariadne ariadne	DSC_0092
PM362	grey card	2016-10-06	Pongumoodu	Ariadne ariadne	DSC_0020
PM365	grey card	2016-10-06	Pongumoodu	Ariadne ariadne	DSC_0015
PM366	grey card	2016-10-06	Pongumoodu	Ariadne ariadne	DSC_0014
PM387	grey card	2016-10-05	Pongumoodu	Ariadne ariadne	DSC_0176
PM390	grey card	2016-10-05	Pongumoodu	Ariadne ariadne	DSC_0173
PM391	grey card	2016-10-05	Pongumoodu	Ariadne ariadne	DSC_0172
PM425	grey card	2017-05-06	Pongumoodu	Ariadne ariadne	DSC_8050	DSC_8049
PM441	grey card	2017-08-08	Pongumoodu	Ariadne ariadne	DSC_9723
PM444	grey card	2017-08-08	Pongumoodu	Ariadne ariadne	DSC_9720
PM454	grey card	2017-08-08	Pongumoodu	Ariadne ariadne	DSC_9708
PM461	grey card	2017-08-08	Pongumoodu	Ariadne ariadne	DSC_9700
PM483	grey card	2017-07-11	Pongumoodu	Ariadne ariadne	DSC_9024
PM484	grey card	2017-07-11	Pongumoodu	Ariadne ariadne	DSC_9023
PM488	grey card	2017-07-11	Pongumoodu	Ariadne ariadne	DSC_9019
PM492	grey card	2017-07-11	Pongumoodu	Ariadne ariadne	DSC_9015
PM500	grey card	2017-07-11	Pongumoodu	Ariadne ariadne	DSC_9006
PM511	grey card	2017-07-11	Pongumoodu	Ariadne ariadne	DSC_8994
PM512	grey card	2017-07-11	Pongumoodu	Ariadne ariadne	DSC_8993
PM515	grey card	2017-07-11	Pongumoodu	Ariadne ariadne	DSC_8990
PM518	grey card	2017-07-11	Pongumoodu	Ariadne ariadne	DSC_8987
PM527	grey card	2017-07-11	Pongumoodu	Ariadne ariadne	DSC_8977
PM529	grey card	2017-07-11	Pongumoodu	Ariadne ariadne	DSC_8975
PM531	grey card	2017-07-11	Pongumoodu	Ariadne ariadne	DSC_8973
PM544	grey card	2017-07-11	Pongumoodu	Ariadne ariadne	DSC_8958
PM591	grey card	2017-07-11	Pongumoodu	Ariadne ariadne	DSC_8905
PM594	grey card	2017-07-11	Pongumoodu	Ariadne ariadne	DSC_8902
PM601	grey card	2017-07-11	Pongumoodu	Ariadne ariadne	DSC_8889
PM607	grey card	2017-07-11	Pongumoodu	Ariadne ariadne	DSC_8883
PM679	grey card	2016-06-19	Pongumoodu	Ariadne ariadne	DSC_4255
PM723	grey card	2016-06-19	Pongumoodu	Ariadne ariadne	DSC_5918
PM727	grey card	2017-01-20	Pongumoodu	Ariadne ariadne	DSC_5907
PM729	grey card	2017-01-20	Pongumoodu	Ariadne ariadne	DSC_5894	DSC_5893-5892
PM737	grey card	2017-01-20	Pongumoodu	Ariadne ariadne	DSC_5880
PM738	grey card	2017-01-20	Pongumoodu	Ariadne ariadne	DSC_5878
PM750	grey card	2017-01-20	Pongumoodu	Ariadne ariadne	DSC_4362
PM768	grey card	2016-06-20	Pongumoodu	Ariadne ariadne	DSC_4342
PM782	grey card	2016-06-20	Pongumoodu	Ariadne ariadne	DSC_4326
PM784	grey card	2016-06-20	Pongumoodu	Ariadne ariadne	DSC_4319
PM793	grey card	2016-06-20	Pongumoodu	Ariadne ariadne	DSC_4301
PM795	grey card	2016-06-20	Pongumoodu	Ariadne ariadne	DSC_4299
PM823	grey card	2016-06-21	Pongumoodu	Ariadne ariadne	DSC_0050
PM826	grey card	2016-06-21	Pongumoodu	Ariadne ariadne	DSC_0046
PM830	grey card	2016-06-21	Pongumoodu	Ariadne ariadne	DSC_0041
PM836	grey card	2016-06-21	Pongumoodu	Ariadne ariadne	DSC_0029
PM842	grey card	2016-06-21	Pongumoodu	Ariadne ariadne	DSC_0021
PM846	grey card	2016-06-21	Pongumoodu	Ariadne ariadne	DSC_6731
PM848	grey card	2017-02-23	Pongumoodu	Ariadne ariadne	DSC_6729
PM859	grey card	2017-02-23	Pongumoodu	Ariadne ariadne	DSC_6707
PM877	grey card	2017-02-22	Pongumoodu	Ariadne ariadne	DSC_6670
PM894	grey card	2017-02-22	Pongumoodu	Ariadne ariadne	DSC_6642
PM909	grey card	2017-02-22	Pongumoodu	Ariadne ariadne	DSC_6619
PM926	grey card	2016-06-22	Pongumoodu	Ariadne ariadne	DSC_0147
PM936	grey card	2016-06-22	Pongumoodu	Ariadne ariadne	DSC_0136
PM977	grey card	2016-06-22	Pongumoodu	Ariadne ariadne	DSC_0082
PM988	grey card	2017-03-22	Pongumoodu	Ariadne ariadne	DSC_7210
PM1015	grey card	2016-11-22	Pongumoodu	Ariadne ariadne	DSC_0039
PM1049	grey card	2017-03-23	Pongumoodu	Ariadne ariadne	DSC_7256
PM1068	grey card	2016-11-23	Pongumoodu	Ariadne ariadne	DSC_0057
PM1087	grey card	2016-11-23	Pongumoodu	Ariadne ariadne	DSC_0037
PM1093	grey card	2016-11-23	Pongumoodu	Ariadne ariadne	DSC_0029
PM1115	grey card	2017-05-24	Pongumoodu	Ariadne ariadne	DSC_8501
PM1116	grey card	2017-05-24	Pongumoodu	Ariadne ariadne	DSC_8500
PM1118	grey card	2017-05-24	Pongumoodu	Ariadne ariadne	DSC_8498
PM1129	grey card	2017-05-24	Pongumoodu	Ariadne ariadne	DSC_8474	DSC_8473
PM1138	grey card	2017-05-24	Pongumoodu	Ariadne ariadne	DSC_8447
PM1220	grey card	2017-05-25	Pongumoodu	Ariadne ariadne	DSC_8587
PM1221	grey card	2017-05-25	Pongumoodu	Ariadne ariadne	DSC_8586
PM1222	grey card	2017-05-25	Pongumoodu	Ariadne ariadne	DSC_8585
PM1223	grey card	2017-05-25	Pongumoodu	Ariadne ariadne	DSC_8584
PM1225	grey card	2017-05-25	Pongumoodu	Ariadne ariadne	DSC_8582
PM1231	grey card	2017-05-25	Pongumoodu	Ariadne ariadne	DSC_8575
PM1232	grey card	2017-05-25	Pongumoodu	Ariadne ariadne	DSC_8574
PM1234	grey card	2017-05-25	Pongumoodu	Ariadne ariadne	DSC_8572
PM1240	grey card	2017-05-25	Pongumoodu	Ariadne ariadne	DSC_8558
PM1242	grey card	2017-05-25	Pongumoodu	Ariadne ariadne	DSC_8552
PM1253	grey card	2017-05-25	Pongumoodu	Ariadne ariadne	DSC_8536
PM1261	grey card	2017-05-25	Pongumoodu	Ariadne ariadne	DSC_8524
PM1263	grey card	2017-05-25	Pongumoodu	Ariadne ariadne	DSC_8522
PM1264	grey card	2017-05-25	Pongumoodu	Ariadne ariadne	DSC_8521
PM1265	grey card	2017-05-25	Pongumoodu	Ariadne ariadne	DSC_8520
PM1267	grey card	2017-05-25	Pongumoodu	Ariadne ariadne	DSC_8518
PM1270	grey card	2017-05-25	Pongumoodu	Ariadne ariadne	DSC_8514
PM1399	grey card	2017-11-29	Pongumoodu	Ariadne ariadne	DSC_0374
PM1406	grey card	2017-11-29	Pongumoodu	Ariadne ariadne	DSC_0365
PM1425	grey card	2017-11-29	Pongumoodu	Ariadne ariadne	DSC_0342
PM1454	grey card	2017-01-31	Pongumoodu	Ariadne ariadne	DSC_6316
TP2	grey card	2017-02-03	Technopark	Ariadne ariadne	DSC_6463
TP3	grey card	2017-02-03	Technopark	Ariadne ariadne	DSC_6461
TP5	grey card	2017-02-03	Technopark	Ariadne ariadne	DSC_6456
TP6	grey card	2017-02-03	Technopark	Ariadne ariadne	DSC_6455	DSC_6454
TP8	grey card	2017-02-03	Technopark	Ariadne ariadne	DSC_6451
TP9	grey card	2017-02-03	Technopark	Ariadne ariadne	DSC_6450
TP11	grey card	2017-02-03	Technopark	Ariadne ariadne	DSC_6446
TP12	grey card	2017-02-03	Technopark	Ariadne ariadne	DSC_6445
TP13	grey card	2017-02-03	Technopark	Ariadne ariadne	DSC_6436
TP14	grey card	2017-02-03	Technopark	Ariadne ariadne	DSC_6432
TP16	grey card	2017-02-03	Technopark	Ariadne ariadne	DSC_6429
TP17	grey card	2017-02-03	Technopark	Ariadne ariadne	DSC_6428
TP18	grey card	2017-02-03	Technopark	Ariadne ariadne	DSC_6427
TP24	grey card	2017-02-03	Technopark	Ariadne ariadne	DSC_6417
TP25	grey card	2017-02-03	Technopark	Ariadne ariadne	DSC_6416	DSC_6415
TP26	grey card	2017-02-03	Technopark	Ariadne ariadne	DSC_6414
TP27	grey card	2017-02-03	Technopark	Ariadne ariadne	DSC_6413
TP28	grey card	2017-02-03	Technopark	Ariadne ariadne	DSC_6412
TP29	grey card	2017-02-03	Technopark	Ariadne ariadne	DSC_6411
TP30	grey card	2017-02-03	Technopark	Ariadne ariadne	DSC_6410
TP33	grey card	2017-02-03	Technopark	Ariadne ariadne	DSC_6407
TP39	grey card	2017-03-07	Technopark	Ariadne ariadne	DSC_6778
TP41	grey card	2017-03-07	Technopark	Ariadne ariadne	DSC_6775
TP42	grey card	2017-03-07	Technopark	Ariadne ariadne	DSC_6773
TP45	grey card	2017-03-07	Technopark	Ariadne ariadne	DSC_6767
TP50	grey card	2017-03-07	Technopark	Ariadne ariadne	DSC_6742
TP51	grey card	2017-03-07	Technopark	Ariadne ariadne	DSC_6741
TP56	grey card	2017-06-07	Technopark	Ariadne ariadne	DSC_8790
TP60	grey card	2017-06-07	Technopark	Ariadne ariadne	DSC_8785
TP63	grey card	2017-06-07	Technopark	Ariadne ariadne	DSC_8781
TP65	grey card	2017-06-07	Technopark	Ariadne ariadne	DSC_8779
TP69	grey card	2017-06-07	Technopark	Ariadne ariadne	DSC_8772
TP72	grey card	2017-06-07	Technopark	Ariadne ariadne	DSC_8766
TP79	grey card	2017-06-07	Technopark	Ariadne ariadne	DSC_8752
TP82	grey card	2017-06-07	Technopark	Ariadne ariadne	DSC_8746
TP85	grey card	2017-06-07	Technopark	Ariadne ariadne	DSC_8741
TP87	grey card	2017-06-07	Technopark	Ariadne ariadne	DSC_8738
TP88	grey card	2017-06-07	Technopark	Ariadne ariadne	DSC_8737
TP95	grey card	2018-02-08	Technopark	Ariadne ariadne	DSC_1620
TP96	grey card	2018-02-08	Technopark	Ariadne ariadne	DSC_1619
TP97	grey card	2018-02-08	Technopark	Ariadne ariadne	DSC_1618
TP237	grey card	2018-02-08	Technopark	Ariadne ariadne	DSC_1446
TP302	grey card	2018-02-08	Technopark	Ariadne ariadne	DSC_1365
TP381	grey card	2017-03-08	Technopark	Ariadne ariadne	DSC_6828
TP439	grey card	2017-05-09	Technopark	Ariadne ariadne	DSC_8124	DSC_8123-8122-8121
TP440	grey card	2017-05-09	Technopark	Ariadne ariadne	DSC_8120	DSC_8119
TP445	grey card	2017-05-09	Technopark	Ariadne ariadne	DSC_8111
TP451	grey card	2017-05-09	Technopark	Ariadne ariadne	DSC_8104	DSC_8103
TP460	grey card	2016-12-09	Technopark	Ariadne ariadne	DSC_0170
TP483	grey card	2016-12-09	Technopark	Ariadne ariadne	DSC_0098
TP498	grey card	2016-12-09	Technopark	Ariadne ariadne	DSC_0061
TP507	grey card	2016-12-09	Technopark	Ariadne ariadne	DSC_0046
TP508	grey card	2016-12-09	Technopark	Ariadne ariadne	DSC_0045
TP510	grey card	2016-12-09	Technopark	Ariadne ariadne	DSC_0040
TP512	grey card	2016-12-09	Technopark	Ariadne ariadne	DSC_0036
TP530	grey card	2017-05-10	Technopark	Ariadne ariadne	DSC_8202	DSC_8201-8200
TP531	grey card	2017-05-10	Technopark	Ariadne ariadne	DSC_8199	DSC_8198
TP534	grey card	2017-05-10	Technopark	Ariadne ariadne	DSC_8193	DSC_8192-8191
TP535	grey card	2017-05-10	Technopark	Ariadne ariadne	DSC_8190	DSC_8189
TP547	grey card	2017-05-10	Technopark	Ariadne ariadne	DSC_8145	DSC_8144
TP550	grey card	2017-05-10	Technopark	Ariadne ariadne	DSC_8139	DSC_8138
TP553	grey card	2017-04-11	Technopark	Ariadne ariadne	DSC_7455
TP564	grey card	2017-04-12	Technopark	Ariadne ariadne	DSC_7558
TP572	grey card	2017-04-12	Technopark	Ariadne ariadne	DSC_7529	DSC_7528
TP575	grey card	2017-04-12	Technopark	Ariadne ariadne	DSC_7522
TP577	grey card	2017-04-12	Technopark	Ariadne ariadne	DSC_7520
TP587	grey card	2016-11-14	Technopark	Ariadne ariadne	DSC_0278
TP612	grey card	2016-11-15	Technopark	Ariadne ariadne	DSC_0007
TP618	grey card	2017-12-20	Technopark	Ariadne ariadne	DSC_0553
TP619	grey card	2017-12-20	Technopark	Ariadne ariadne	DSC_0552
TP620	grey card	2017-12-20	Technopark	Ariadne ariadne	DSC_0551
TP634	grey card	2017-12-20	Technopark	Ariadne ariadne	DSC_0532
TP637	grey card	2017-12-20	Technopark	Ariadne ariadne	DSC_0529
TP641	grey card	2017-12-20	Technopark	Ariadne ariadne	DSC_0522
TP658	grey card	2017-12-20	Technopark	Ariadne ariadne	DSC_0500
TP687	grey card	2017-12-20	Technopark	Ariadne ariadne	DSC_0463
TP690	grey card	2017-12-20	Technopark	Ariadne ariadne	DSC_0459
TP698	grey card	2017-12-20	Technopark	Ariadne ariadne	DSC_0449
TP743	grey card	2017-12-21	Technopark	Ariadne ariadne	DSC_0658
TP745	grey card	2017-12-21	Technopark	Ariadne ariadne	DSC_0655
TP783	grey card	2017-12-21	Technopark	Ariadne ariadne	DSC_0600
TP785	grey card	2017-12-21	Technopark	Ariadne ariadne	DSC_0598
TP787	grey card	2017-12-21	Technopark	Ariadne ariadne	DSC_0596
TP864	grey card	2018-03-22	Technopark	Ariadne ariadne	DSC_1994
TP902	grey card	2017-01-24	Technopark	Ariadne ariadne	DSC_6053
TP904	grey card	2017-01-24	Technopark	Ariadne ariadne	DSC_6050
TP910	grey card	2017-01-24	Technopark	Ariadne ariadne	DSC_6041
TP912	grey card	2017-01-24	Technopark	Ariadne ariadne	DSC_6039
TP914	grey card	2017-01-24	Technopark	Ariadne ariadne	DSC_6037
TP915	grey card	2017-01-24	Technopark	Ariadne ariadne	DSC_6036
TP917	grey card	2017-01-24	Technopark	Ariadne ariadne	DSC_6034
TP918	grey card	2017-01-24	Technopark	Ariadne ariadne	DSC_6033
TP919	grey card	2017-01-24	Technopark	Ariadne ariadne	DSC_6032
TP923	grey card	2017-01-24	Technopark	Ariadne ariadne	DSC_6025
TP924	grey card	2017-01-24	Technopark	Ariadne ariadne	DSC_6024
TP926	grey card	2017-01-24	Technopark	Ariadne ariadne	DSC_6020
TP927	grey card	2017-01-24	Technopark	Ariadne ariadne	DSC_6019
TP928	grey card	2017-01-24	Technopark	Ariadne ariadne	DSC_6018
TP932	grey card	2017-01-24	Technopark	Ariadne ariadne	DSC_6013	DSC_6012
TP933	grey card	2017-01-24	Technopark	Ariadne ariadne	DSC_6011
TP936	grey card	2017-01-24	Technopark	Ariadne ariadne	DSC_6007	DSC_6006-6005
TP937	grey card	2017-01-24	Technopark	Ariadne ariadne	DSC_6004	DSC_6003
TP938	grey card	2017-01-24	Technopark	Ariadne ariadne	DSC_6002	DSC_6001
TP940	grey card	2017-01-24	Technopark	Ariadne ariadne	DSC_5995
TP942	grey card	2017-01-24	Technopark	Ariadne ariadne	DSC_5993
TP944	grey card	2017-01-24	Technopark	Ariadne ariadne	DSC_5990	DSC_5989
TP951	grey card	2017-01-24	Technopark	Ariadne ariadne	DSC_5972
TP957	grey card	2017-07-24	Technopark	Ariadne ariadne	DSC_9447
TP989	grey card	2017-07-24	Technopark	Ariadne ariadne	DSC_9401
TP1028	grey card	2017-07-24	Technopark	Ariadne ariadne	DSC_9355
TP1040	grey card	2017-07-24	Technopark	Ariadne ariadne	DSC_9337
TP1048	grey card	2017-07-24	Technopark	Ariadne ariadne	DSC_9324
TP1061	grey card	2017-07-24	Technopark	Ariadne ariadne	DSC_9308
TP1097	grey card	2017-07-24	Technopark	Ariadne ariadne	DSC_9254
TP1102	grey card	2017-07-24	Technopark	Ariadne ariadne	DSC_9246
TP1156	grey card	2017-07-24	Technopark	Ariadne ariadne	DSC_9180
TP1157	grey card	2017-07-24	Technopark	Ariadne ariadne	DSC_9179
TP1158	grey card	2017-07-24	Technopark	Ariadne ariadne	DSC_9178
TP1164	grey card	2017-07-24	Technopark	Ariadne ariadne	DSC_9172
TP1185	grey card	2017-07-24	Technopark	Ariadne ariadne	DSC_9150
TP1198	grey card	2017-07-24	Technopark	Ariadne ariadne	DSC_9127	DSC_9126
TP1209	grey card	2017-01-25	Technopark	Ariadne ariadne	DSC_6134
TP1211	grey card	2017-01-25	Technopark	Ariadne ariadne	DSC_6132
TP1212	grey card	2017-01-25	Technopark	Ariadne ariadne	DSC_6130
TP1213	grey card	2017-01-25	Technopark	Ariadne ariadne	DSC_6129
TP1214	grey card	2017-01-25	Technopark	Ariadne ariadne	DSC_6128
TP1215	grey card	2017-01-25	Technopark	Ariadne ariadne	DSC_6127
TP1220	grey card	2017-01-25	Technopark	Ariadne ariadne	DSC_6094
TP1221	grey card	2017-01-25	Technopark	Ariadne ariadne	DSC_6093	DSC_6092
TP1222	grey card	2017-01-25	Technopark	Ariadne ariadne	DSC_6091
TP1223	grey card	2017-01-25	Technopark	Ariadne ariadne	DSC_6090
TP1224	grey card	2017-01-25	Technopark	Ariadne ariadne	DSC_6087	DSC_6086
TP1225	grey card	2017-01-25	Technopark	Ariadne ariadne	DSC_6085
TP1228	grey card	2017-01-25	Technopark	Ariadne ariadne	DSC_6076
TP1230	grey card	2017-01-25	Technopark	Ariadne ariadne	DSC_6072
TP1231	grey card	2017-01-25	Technopark	Ariadne ariadne	DSC_6071	DSC_6070
TP1232	grey card	2017-01-25	Technopark	Ariadne ariadne	DSC_6069
TP1234	grey card	2017-01-25	Technopark	Ariadne ariadne	DSC_6065
TP1237	wild	2017-01-25	Technopark	Ariadne ariadne	DSC_6061
TP1244	grey card	2017-08-25	Technopark	Ariadne ariadne	DSC_9939
TP1269	grey card	2017-08-25	Technopark	Ariadne ariadne	DSC_9903
TP1281	grey card	2017-08-25	Technopark	Ariadne ariadne	DSC_9888
TP1351	grey card	2017-08-25	Technopark	Ariadne ariadne	DSC_9792
TP1355	grey card	2017-08-25	Technopark	Ariadne ariadne	DSC_9787
TP1400	grey card	2017-08-26	Technopark	Ariadne ariadne	DSC_9985
TP1416	grey card	2017-08-26	Technopark	Ariadne ariadne	DSC_9967
TP1446	grey card	2017-08-26	Technopark	Ariadne ariadne	DSC_0119
TP1461	grey card	2017-08-26	Technopark	Ariadne ariadne	DSC_0100	DSC_0099
PM25	grey card	2018-03-01	Pongumoodu	Ariadne merione	DSC_1788
PM196	grey card	2017-02-02	Pongumoodu	Ariadne merione	DSC_6381
PM230	grey card	2016-08-03	Pongumoodu	Ariadne merione	DSC_4654
PM257	grey card	2016-08-03	Pongumoodu	Ariadne merione	DSC_4606
PM389	grey card	2016-10-05	Pongumoodu	Ariadne merione	DSC_0174
PM416	grey card	2017-05-05	Pongumoodu	Ariadne merione	DSC_7952	DSC_7951-7950-7949
PM476	grey card	2017-07-11	Pongumoodu	Ariadne merione	DSC_9031
PM728	grey card	2017-01-20	Pongumoodu	Ariadne merione	DSC_5906	DSC_5905
PM730	grey card	2017-01-20	Pongumoodu	Ariadne merione	DSC_5891
PM741	grey card	2017-01-20	Pongumoodu	Ariadne merione	DSC_5874
PM801	grey card	2016-06-20	Pongumoodu	Ariadne merione	DSC_5938
PM802	grey card	2017-01-21	Pongumoodu	Ariadne merione	DSC_5937
PM809	grey card	2017-01-21	Pongumoodu	Ariadne merione	DSC_0072	DSC_0071
PM881	grey card	2017-02-22	Pongumoodu	Ariadne merione	DSC_6664
PM889	wild	2017-02-22	Pongumoodu	Ariadne merione	DSC_6652
PM890	grey card	2017-02-22	Pongumoodu	Ariadne merione	DSC_6649	DSC_6648
PM891	grey card	2017-02-22	Pongumoodu	Ariadne merione	DSC_6646
PM956	grey card	2016-06-22	Pongumoodu	Ariadne merione	DSC_0108
PM1054	grey card	2017-03-23	Pongumoodu	Ariadne merione	DSC_7236	DSC_7235
PM1109	grey card	2017-03-24	Pongumoodu	Ariadne merione	DSC_7295
PM1120	grey card	2017-05-24	Pongumoodu	Ariadne merione	DSC_8496
PM1125	grey card	2017-05-24	Pongumoodu	Ariadne merione	DSC_8489
PM1300	grey card	2017-09-28	Pongumoodu	Ariadne merione	DSC_0246
PM1408	grey card	2017-11-29	Pongumoodu	Ariadne merione	DSC_0363
PM1414	grey card	2017-11-29	Pongumoodu	Ariadne merione	DSC_0355
PM1426	grey card	2017-11-29	Pongumoodu	Ariadne merione	DSC_0341
PM1456	grey card	2017-01-31	Pongumoodu	Ariadne merione	DSC_6313
PM1483	grey card	2017-01-31	Pongumoodu	Ariadne merione	DSC_6259
TP1	grey card	2017-02-03	Technopark	Ariadne merione	DSC_6464
TP4	grey card	2017-02-03	Technopark	Ariadne merione	DSC_6459	DSC_6458
TP31	grey card	2017-02-03	Technopark	Ariadne merione	DSC_6409
TP61	grey card	2017-06-07	Technopark	Ariadne merione	DSC_8784
TP90	grey card	2017-06-07	Technopark	Ariadne merione	DSC_8735
TP94	grey card	2018-02-08	Technopark	Ariadne merione	DSC_1621
TP298	grey card	2018-02-08	Technopark	Ariadne merione	DSC_1369
TP392	grey card	2017-03-08	Technopark	Ariadne merione	DSC_6797
TP408	wild	2016-12-08	Technopark	Ariadne merione	DSC_0054
TP413	wild	2016-12-08	Technopark	Ariadne merione	DSC_0038
TP433	grey card	2017-03-09	Technopark	Ariadne merione	DSC_6839
TP435	grey card	2017-05-09	Technopark	Ariadne merione	DSC_8134	DSC_8133
TP441	grey card	2017-05-09	Technopark	Ariadne merione	DSC_8118
TP455	grey card	2017-05-09	Technopark	Ariadne merione	DSC_8093
TP456	grey card	2017-05-09	Technopark	Ariadne merione	DSC_8092	DSC_8091
TP463	grey card	2016-12-09	Technopark	Ariadne merione	DSC_0162
TP473	grey card	2016-12-09	Technopark	Ariadne merione	DSC_0123
TP484	grey card	2016-12-09	Technopark	Ariadne merione	DSC_0097
TP485	grey card	2016-12-09	Technopark	Ariadne merione	DSC_0096
TP487	grey card	2016-12-09	Technopark	Ariadne merione	DSC_0094
TP499	grey card	2016-12-09	Technopark	Ariadne merione	DSC_0060
TP509	grey card	2016-12-09	Technopark	Ariadne merione	DSC_0044
TP536	grey card	2017-05-10	Technopark	Ariadne merione	DSC_8188
TP557	grey card	2017-05-11	Technopark	Ariadne merione	DSC_8246	DSC_8245
TP562	grey card	2017-05-11	Technopark	Ariadne merione	DSC_8225	DSC_8224
TP565	grey card	2017-04-12	Technopark	Ariadne merione	DSC_7557
TP566	grey card	2017-04-12	Technopark	Ariadne merione	DSC_7555
TP567	grey card	2017-04-12	Technopark	Ariadne merione	DSC_7554	DSC_7553
TP571	grey card	2017-04-12	Technopark	Ariadne merione	DSC_7531	DSC_7530
TP586	grey card	2016-11-14	Technopark	Ariadne merione	DSC_0279
TP614	grey card	2016-11-15	Technopark	Ariadne merione	DSC_0005
TP617	grey card	2017-12-20	Technopark	Ariadne merione	DSC_0555	DSC_0554
TP621	grey card	2017-12-20	Technopark	Ariadne merione	DSC_0550
TP689	grey card	2017-12-20	Technopark	Ariadne merione	DSC_0460
TP695	grey card	2017-12-20	Technopark	Ariadne merione	DSC_0452
TP696	grey card	2017-12-20	Technopark	Ariadne merione	DSC_0451
TP729	grey card	2017-12-21	Technopark	Ariadne merione	DSC_0672
TP730	grey card	2017-12-21	Technopark	Ariadne merione	DSC_0671
TP744	grey card	2017-12-21	Technopark	Ariadne merione	DSC_0656
TP756	grey card	2017-12-21	Technopark	Ariadne merione	DSC_0635
TP784	grey card	2017-12-21	Technopark	Ariadne merione	DSC_0599
TP786	grey card	2017-12-21	Technopark	Ariadne merione	DSC_0597
TP790	grey card	2017-12-21	Technopark	Ariadne merione	DSC_0593
TP865	grey card	2018-03-22	Technopark	Ariadne merione	DSC_1993
TP878	grey card	2018-03-22	Technopark	Ariadne merione	DSC_1973
TP901	grey card	2017-01-24	Technopark	Ariadne merione	DSC_6055	DSC_6054
TP903	grey card	2017-01-24	Technopark	Ariadne merione	DSC_6052
TP911	grey card	2017-01-24	Technopark	Ariadne merione	DSC_6040
TP913	grey card	2017-01-24	Technopark	Ariadne merione	DSC_6038
TP929	grey card	2017-01-24	Technopark	Ariadne merione	DSC_6016
TP930	grey card	2017-01-24	Technopark	Ariadne merione	DSC_6015
TP931	grey card	2017-01-24	Technopark	Ariadne merione	DSC_6014
TP934	grey card	2017-01-24	Technopark	Ariadne merione	DSC_6010
TP946	grey card	2017-01-24	Technopark	Ariadne merione	DSC_5983
TP947	grey card	2017-01-24	Technopark	Ariadne merione	DSC_5982
TP952	grey card	2017-01-24	Technopark	Ariadne merione	DSC_5971
TP979	grey card	2017-07-24	Technopark	Ariadne merione	DSC_9420
TP1023	grey card	2017-07-24	Technopark	Ariadne merione	DSC_9360
TP1050	grey card	2017-07-24	Technopark	Ariadne merione	DSC_9322
TP1083	grey card	2017-07-24	Technopark	Ariadne merione	DSC_9273
TP1204	grey card	2017-01-25	Technopark	Ariadne merione	DSC_6143
TP1210	grey card	2017-01-25	Technopark	Ariadne merione	DSC_6133
TP1229	grey card	2017-01-25	Technopark	Ariadne merione	DSC_6074	DSC_6073
TP1233	grey card	2017-01-25	Technopark	Ariadne merione	DSC_6068	DSC_6067-6066
TP1315	grey card	2017-08-25	Technopark	Ariadne merione	DSC_9848
TP1344	grey card	2017-08-25	Technopark	Ariadne merione	DSC_9800
TP1354	grey card	2017-08-25	Technopark	Ariadne merione	DSC_9788
PM355	wild	2016-10-06	Pongumoodu	Castalius rosimon	pierrot.JPG
PM90	grey card	2018-03-01	Pongumoodu	Charaxes solon	DSC_1707
PM160	grey card	2016-08-02	Pongumoodu	Charaxes solon	DSC_4555
PM182	grey card	2016-08-02	Pongumoodu	Charaxes solon	DSC_4529
PM183	grey card	2016-08-02	Pongumoodu	Charaxes solon	DSC_4528	DSC_4527
PM226	grey card	2016-08-03	Pongumoodu	Charaxes solon	DSC_4658
PM264	grey card	2016-06-03	Pongumoodu	Charaxes solon	DSC_4028
PM341	grey card	2016-10-04	Pongumoodu	Charaxes solon	DSC_0081
PM371	grey card	2016-10-06	Pongumoodu	Charaxes solon	DSC_0009
PM654	grey card	2017-07-11	Pongumoodu	Charaxes solon	DSC_8833
PM857	grey card	2017-02-23	Pongumoodu	Charaxes solon	DSC_6711
PM901	grey card	2017-02-22	Pongumoodu	Charaxes solon	DSC_6631
PM994	grey card	2017-03-22	Pongumoodu	Charaxes solon	DSC_7182	DSC_7181
PM1011	grey card	2016-11-22	Pongumoodu	Charaxes solon	DSC_0048
TP36	grey card	2017-03-07	Technopark	Charaxes solon	DSC_6782
TP242	grey card	2018-02-08	Technopark	Charaxes solon	DSC_1440
TP333	grey card	2018-02-08	Technopark	Charaxes solon	DSC_1332
TP849	grey card	2018-03-22	Technopark	Charaxes solon	DSC_2015
TP1349	grey card	2017-08-25	Technopark	Charaxes solon	DSC_9794
PM34	grey card	2018-03-01	Pongumoodu	Elymnias caudata	DSC_1778
PM35	grey card	2018-03-01	Pongumoodu	Elymnias caudata	DSC_1777
PM76	grey card	2018-03-01	Pongumoodu	Elymnias caudata	DSC_1724
PM80	grey card	2018-03-01	Pongumoodu	Elymnias caudata	DSC_1720
PM88	grey card	2018-03-01	Pongumoodu	Elymnias caudata	DSC_1709
PM96	grey card	2018-03-01	Pongumoodu	Elymnias caudata	DSC_1697
PM110	grey card	2018-03-01	Pongumoodu	Elymnias caudata	DSC_1681
PM176	grey card	2016-08-02	Pongumoodu	Elymnias caudata	DSC_4535
PM198	grey card	2017-02-02	Pongumoodu	Elymnias caudata	DSC_6379
PM202	grey card	2017-02-02	Pongumoodu	Elymnias caudata	DSC_6372
PM204	grey card	2017-02-02	Pongumoodu	Elymnias caudata	DSC_6369
PM217	grey card	2017-02-02	Pongumoodu	Elymnias caudata	DSC_6345
PM260	grey card	2016-08-03	Pongumoodu	Elymnias caudata	DSC_4597
PM279	grey card	2017-06-03	Pongumoodu	Elymnias caudata	DSC_8711	DSC_8710
PM280	grey card	2017-06-03	Pongumoodu	Elymnias caudata	DSC_8709
PM292	grey card	2016-10-05	Pongumoodu	Elymnias caudata	DSC_0179
PM302	grey card	2016-10-05	Pongumoodu	Elymnias caudata	DSC_0159
PM315	grey card	2016-10-05	Pongumoodu	Elymnias caudata	DSC_0140
PM324	grey card	2016-10-04	Pongumoodu	Elymnias caudata	DSC_0105
PM356	wild	2016-10-05	Pongumoodu	Elymnias caudata	palmfly.JPG
PM370	grey card	2016-10-06	Pongumoodu	Elymnias caudata	DSC_0010
PM386	grey card	2016-10-05	Pongumoodu	Elymnias caudata	DSC_0179
PM396	grey card	2016-10-05	Pongumoodu	Elymnias caudata	DSC_0159
PM423	grey card	2017-05-06	Pongumoodu	Elymnias caudata	DSC_8058	DSC_8057-8054
PM427	grey card	2017-05-06	Pongumoodu	Elymnias caudata	DSC_8045
PM432	grey card	2017-05-06	Pongumoodu	Elymnias caudata	DSC_8027	DSC_8026
PM449	grey card	2017-08-08	Pongumoodu	Elymnias caudata	DSC_9715
PM505	wild	2017-07-11	Pongumoodu	Elymnias caudata	DSC_9001
PM631	grey card	2017-07-11	Pongumoodu	Elymnias caudata	DSC_8857
PM652	grey card	2017-07-11	Pongumoodu	Elymnias caudata	DSC_8835
PM653	grey card	2017-07-11	Pongumoodu	Elymnias caudata	DSC_8834
PM674	wild	2016-12-12	Pongumoodu	Elymnias caudata	DSC_0209
PM743	grey card	2017-01-20	Pongumoodu	Elymnias caudata	DSC_5868
PM744	grey card	2017-01-20	Pongumoodu	Elymnias caudata	DSC_5866
PM749	grey card	2017-01-20	Pongumoodu	Elymnias caudata	DSC_5859
PM803	grey card	2017-01-21	Pongumoodu	Elymnias caudata	DSC_5936	DSC_5935
PM806	grey card	2017-01-21	Pongumoodu	Elymnias caudata	DSC_5930
PM808	grey card	2017-01-21	Pongumoodu	Elymnias caudata	DSC_5859
PM852	grey card	2017-02-23	Pongumoodu	Elymnias caudata	DSC_6719	DSC_6718
PM856	grey card	2017-02-23	Pongumoodu	Elymnias caudata	DSC_6712
PM863	grey card	2017-02-23	Pongumoodu	Elymnias caudata	DSC_6701
PM866	grey card	2017-02-23	Pongumoodu	Elymnias caudata	DSC_6694
PM878	grey card	2017-02-22	Pongumoodu	Elymnias caudata	DSC_6669
PM884	grey card	2017-02-22	Pongumoodu	Elymnias caudata	DSC_6659
PM886	grey card	2017-02-22	Pongumoodu	Elymnias caudata	DSC_6657
PM887	grey card	2017-02-22	Pongumoodu	Elymnias caudata	DSC_6656
PM896	grey card	2017-02-22	Pongumoodu	Elymnias caudata	DSC_6640	DSC_6639-6638
PM958	grey card	2016-06-22	Pongumoodu	Elymnias caudata	DSC_0106
PM1021	grey card	2016-11-22	Pongumoodu	Elymnias caudata	DSC_0025
PM1029	grey card	2016-11-22	Pongumoodu	Elymnias caudata	DSC_0015	DSC_0014
PM1042	grey card	2017-03-23	Pongumoodu	Elymnias caudata	DSC_7276
PM1043	grey card	2017-03-23	Pongumoodu	Elymnias caudata	DSC_7275
PM1051	grey card	2017-03-23	Pongumoodu	Elymnias caudata	DSC_7248	DSC_7247-DSC_7246
PM1059	grey card	2017-03-23	Pongumoodu	Elymnias caudata	DSC_7227
PM1081	grey card	2016-11-23	Pongumoodu	Elymnias caudata	DSC_0044
PM1177	grey card	2018-01-25	Pongumoodu	Elymnias caudata	DSC_1113
PM1179	grey card	2018-01-25	Pongumoodu	Elymnias caudata	DSC_1111
PM1211	grey card	2018-01-25	Pongumoodu	Elymnias caudata	DSC_1072
PM1238	wild	2017-05-25	Pongumoodu	Elymnias caudata	DSC_8561
PM1278	grey card	2017-09-28	Pongumoodu	Elymnias caudata	DSC_0287	DSC_0286
PM1299	grey card	2017-09-28	Pongumoodu	Elymnias caudata	DSC_0250
PM1311	grey card	2017-09-28	Pongumoodu	Elymnias caudata	DSC_0231
PM1328	grey card	2017-09-27	Pongumoodu	Elymnias caudata	DSC_0208
PM1347	grey card	2017-09-27	Pongumoodu	Elymnias caudata	DSC_0174
PM1350	grey card	2017-09-27	Pongumoodu	Elymnias caudata	DSC_0165
PM1351	grey card	2017-09-27	Pongumoodu	Elymnias caudata	DSC_0164	DSC_0163
PM1355	grey card	2017-09-27	Pongumoodu	Elymnias caudata	DSC_0156
PM1360	grey card	2017-09-27	Pongumoodu	Elymnias caudata	DSC_0149
PM1386	grey card	2017-11-29	Pongumoodu	Elymnias caudata	DSC_0390
PM1387	grey card	2017-11-29	Pongumoodu	Elymnias caudata	DSC_0389
PM1427	grey card	2017-11-29	Pongumoodu	Elymnias caudata	DSC_0340
PM1429	grey card	2017-11-29	Pongumoodu	Elymnias caudata	DSC_0338
PM1432	grey card	2017-11-29	Pongumoodu	Elymnias caudata	DSC_0335
TP81	grey card	2017-06-07	Technopark	Elymnias caudata	DSC_8748	DSC_8747
TP84	grey card	2017-06-07	Technopark	Elymnias caudata	DSC_8743	DSC_8742
TP82	grey card	2017-06-07	Technopark	Elymnias caudata	DSC_8732	DSC_8731
TP109	grey card	2018-02-08	Technopark	Elymnias caudata	DSC_1604
TP121	grey card	2018-02-08	Technopark	Elymnias caudata	DSC_1590
TP275	grey card	2018-02-08	Technopark	Elymnias caudata	DSC_1397
TP383	grey card	2017-03-08	Technopark	Elymnias caudata	DSC_6826
TP385	grey card	2017-03-08	Technopark	Elymnias caudata	DSC_6823
TP387	grey card	2017-03-08	Technopark	Elymnias caudata	DSC_6819
TP400	grey card	2016-12-08	Technopark	Elymnias caudata	DSC_0079	DSC_0078
TP402	grey card	2016-12-08	Technopark	Elymnias caudata	DSC_0075
TP443	grey card	2017-05-09	Technopark	Elymnias caudata	DSC_8115
TP447	grey card	2017-05-09	Technopark	Elymnias caudata	DSC_8109
TP526	grey card	2016-12-09	Technopark	Elymnias caudata	DSC_0005
TP527	grey card	2016-12-09	Technopark	Elymnias caudata	DSC_0003
TP545	grey card	2017-05-10	Technopark	Elymnias caudata	DSC_8149	DSC_8148
TP546	grey card	2017-05-10	Technopark	Elymnias caudata	DSC_8147	DSC_8146
TP556	grey card	2017-05-11	Technopark	Elymnias caudata	DSC_8248
TP559	grey card	2017-05-11	Technopark	Elymnias caudata	DSC_8233	DSC_8232
TP561	grey card	2017-05-11	Technopark	Elymnias caudata	DSC_8226
TP625	grey card	2017-12-20	Technopark	Elymnias caudata	DSC_0546
TP627	grey card	2017-12-20	Technopark	Elymnias caudata	DSC_0543
TP635	grey card	2017-12-20	Technopark	Elymnias caudata	DSC_0531
TP639	grey card	2017-12-20	Technopark	Elymnias caudata	DSC_0527
TP662	grey card	2017-12-20	Technopark	Elymnias caudata	DSC_0496	DSC_0495
TP740	grey card	2017-12-21	Technopark	Elymnias caudata	DSC_0661
TP749	grey card	2017-12-21	Technopark	Elymnias caudata	DSC_0651
TP751	grey card	2017-12-21	Technopark	Elymnias caudata	DSC_0648
TP753	grey card	2017-12-21	Technopark	Elymnias caudata	DSC_0645
TP779	grey card	2017-12-21	Technopark	Elymnias caudata	DSC_0605
TP834	grey card	2018-03-22	Technopark	Elymnias caudata	DSC_2032
TP835	grey card	2018-03-22	Technopark	Elymnias caudata	DSC_2031
TP836	grey card	2018-03-22	Technopark	Elymnias caudata	DSC_2030
TP837	grey card	2018-03-22	Technopark	Elymnias caudata	DSC_2029
TP838	grey card	2018-03-22	Technopark	Elymnias caudata	DSC_2028
TP861	grey card	2018-03-22	Technopark	Elymnias caudata	DSC_2001
TP871	grey card	2018-03-22	Technopark	Elymnias caudata	DSC_1987
TP872	grey card	2018-03-22	Technopark	Elymnias caudata	DSC_1986
TP899	grey card	2018-03-22	Technopark	Elymnias caudata	DSC_1949
TP945	grey card	2017-01-24	Technopark	Elymnias caudata	DSC_5985
TP948	grey card	2017-01-24	Technopark	Elymnias caudata	DSC_5980
TP949	grey card	2017-01-24	Technopark	Elymnias caudata	DSC_5979
TP953	grey card	2017-01-24	Technopark	Elymnias caudata	DSC_5970
TP954	grey card	2017-01-24	Technopark	Elymnias caudata	DSC_5969
TP1036	grey card	2017-07-24	Technopark	Elymnias caudata	DSC_9347
TP1057	grey card	2017-07-24	Technopark	Elymnias caudata	DSC_9315
TP1063	grey card	2017-07-24	Technopark	Elymnias caudata	DSC_9306
TP1155	grey card	2017-07-24	Technopark	Elymnias caudata	DSC_9182
TP1206	grey card	2017-01-25	Technopark	Elymnias caudata	DSC_6140
TP1248	grey card	2017-08-25	Technopark	Elymnias caudata	DSC_9934
TP1251	grey card	2017-08-25	Technopark	Elymnias caudata	DSC_9931
TP1291	grey card	2017-08-25	Technopark	Elymnias caudata	DSC_9877
TP1296	grey card	2017-08-25	Technopark	Elymnias caudata	DSC_9872
TP1314	grey card	2017-08-25	Technopark	Elymnias caudata	DSC_9849
TP1319	wild	2017-08-25	Technopark	Elymnias caudata	DSC_9844	From DSC_9843 To 9840
TP1327	grey card	2017-08-25	Technopark	Elymnias caudata	DSC_9830
TP1330	grey card	2017-08-25	Technopark	Elymnias caudata	DSC_9827	DSC_9826
TP1332	grey card	2017-08-25	Technopark	Elymnias caudata	DSC_9823
TP1333	grey card	2017-08-25	Technopark	Elymnias caudata	DSC_9822
TP1334	grey card	2017-08-25	Technopark	Elymnias caudata	DSC_9821	DSC_9820
TP1336	grey card	2017-08-25	Technopark	Elymnias caudata	DSC_9818
TP1338	grey card	2017-08-25	Technopark	Elymnias caudata	DSC_9814	DSC_9813
TP1339	grey card	2017-08-25	Technopark	Elymnias caudata	DSC_9812
TP1340	grey card	2017-08-25	Technopark	Elymnias caudata	DSC_9811	DSC_9810
TP1341	grey card	2017-08-25	Technopark	Elymnias caudata	DSC_9809
TP1357	grey card	2017-08-25	Technopark	Elymnias caudata	DSC_9785
TP1449	grey card	2017-08-26	Technopark	Elymnias caudata	DSC_0116
TP1454	grey card	2017-08-26	Technopark	Elymnias caudata	DSC_0111
TP1457	grey card	2017-08-26	Technopark	Elymnias caudata	DSC_0108
TP1460	grey card	2017-08-26	Technopark	Elymnias caudata	DSC_0105
TP1510	grey card	2017-08-26	Technopark	Elymnias caudata	DSC_0036
TP1531	grey card	2017-08-26	Technopark	Elymnias caudata	DSC_0010
TP1532	grey card	2017-08-26	Technopark	Elymnias caudata	DSC_0009
PM10	grey card	2017-06-01	Pongumoodu	Euthalia aconthea	DSC_8683
PM15	grey card	2018-03-01	Pongumoodu	Euthalia aconthea	DSC_1801
PM16	grey card	2018-03-01	Pongumoodu	Euthalia aconthea	DSC_1800
PM31	grey card	2018-03-01	Pongumoodu	Euthalia aconthea	DSC_1781
PM48	grey card	2018-03-01	Pongumoodu	Euthalia aconthea	DSC_1764
PM74	grey card	2018-03-01	Pongumoodu	Euthalia aconthea	DSC_1726
PM94	grey card	2018-03-01	Pongumoodu	Euthalia aconthea	DSC_1701
PM100	grey card	2018-03-01	Pongumoodu	Euthalia aconthea	DSC_1693
PM106	grey card	2018-03-01	Pongumoodu	Euthalia aconthea	DSC_1687
PM119	grey card	2018-03-01	Pongumoodu	Euthalia aconthea	DSC_1666
PM184	grey card	2016-08-02	Pongumoodu	Euthalia aconthea	DSC_4526
PM189	grey card	2017-02-02	Pongumoodu	Euthalia aconthea	DSC_6395
PM190	grey card	2017-02-02	Pongumoodu	Euthalia aconthea	DSC_6394
PM191	grey card	2017-02-02	Pongumoodu	Euthalia aconthea	DSC_6393
PM239	grey card	2016-08-03	Pongumoodu	Euthalia aconthea	DSC_4641
PM249	grey card	2016-08-03	Pongumoodu	Euthalia aconthea	DSC_4615
PM252	grey card	2016-08-03	Pongumoodu	Euthalia aconthea	DSC_4612
PM291	grey card	2016-10-05	Pongumoodu	Euthalia aconthea	DSC_0180
PM311	grey card	2016-10-05	Pongumoodu	Euthalia aconthea	DSC_0145
PM328	grey card	2016-10-04	Pongumoodu	Euthalia aconthea	DSC_0098
PM331	grey card	2016-10-04	Pongumoodu	Euthalia aconthea	DSC_0094
PM348	grey card	2016-10-04	Pongumoodu	Euthalia aconthea	DSC_0070
PM354	grey card	2016-10-04	Pongumoodu	Euthalia aconthea	DSC_0058
PM358	grey card	2016-10-06	Pongumoodu	Euthalia aconthea	DSC_0024
PM372	grey card	2016-10-06	Pongumoodu	Euthalia aconthea	DSC_0008
PM378	wild	2016-04-05	Pongumoodu	Euthalia aconthea	DSC_3024	DSC_3023-3022
PM385	grey card	2016-10-05	Pongumoodu	Euthalia aconthea	DSC_0180
PM420	grey card	2017-05-05	Pongumoodu	Euthalia aconthea	DSC_7930	DSC_7929
PM466	grey card	2017-08-08	Pongumoodu	Euthalia aconthea	DSC_9695
PM467	grey card	2017-08-08	Pongumoodu	Euthalia aconthea	DSC_9694	DSC_9693
PM539	grey card	2017-07-11	Pongumoodu	Euthalia aconthea	DSC_8965
PM676	wild	2016-12-12	Pongumoodu	Euthalia aconthea	DSC_0206
PM851	grey card	2017-02-23	Pongumoodu	Euthalia aconthea	DSC_6723
PM854	grey card	2017-02-23	Pongumoodu	Euthalia aconthea	DSC_6716
PM855	grey card	2017-02-23	Pongumoodu	Euthalia aconthea	DSC_6714
PM860	grey card	2017-02-23	Pongumoodu	Euthalia aconthea	DSC_6706
PM868	grey card	2017-02-23	Pongumoodu	Euthalia aconthea	DSC_6687	DSC_6686
PM875	grey card	2017-02-22	Pongumoodu	Euthalia aconthea	DSC_6673
PM893	grey card	2017-02-22	Pongumoodu	Euthalia aconthea	DSC_6644
PM905	grey card	2017-02-22	Pongumoodu	Euthalia aconthea	DSC_6624
PM906	grey card	2017-02-22	Pongumoodu	Euthalia aconthea	DSC_6623
PM976	grey card	2016-06-22	Pongumoodu	Euthalia aconthea	DSC_0086	DSC_0085
PM993	grey card	2017-03-22	Pongumoodu	Euthalia aconthea	DSC_7185
PM1010	grey card	2016-11-22	Pongumoodu	Euthalia aconthea	DSC_0049
PM1027	grey card	2016-11-22	Pongumoodu	Euthalia aconthea	DSC_0018
PM1032	grey card	2016-11-22	Pongumoodu	Euthalia aconthea	DSC_0011
PM1055	grey card	2017-03-23	Pongumoodu	Euthalia aconthea	DSC_7234	DSC_7233
PM1057	grey card	2017-03-23	Pongumoodu	Euthalia aconthea	DSC_7231
PM1072	grey card	2016-11-23	Pongumoodu	Euthalia aconthea	DSC_0053
PM1073	grey card	2016-11-23	Pongumoodu	Euthalia aconthea	DSC_0052
PM1092	grey card	2016-11-23	Pongumoodu	Euthalia aconthea	DSC_0030
PM1105	grey card	2017-03-24	Pongumoodu	Euthalia aconthea	DSC_7304
PM1108	grey card	2017-03-24	Pongumoodu	Euthalia aconthea	DSC_7296
PM1110	grey card	2017-03-24	Pongumoodu	Euthalia aconthea	DSC_7294
PM1111	grey card	2017-03-24	Pongumoodu	Euthalia aconthea	DSC_7290	DSC_7289
PM1128	grey card	2017-05-24	Pongumoodu	Euthalia aconthea	DSC_8477
PM1237	grey card	2017-05-25	Pongumoodu	Euthalia aconthea	DSC_8567
PM1247	grey card	2017-05-25	Pongumoodu	Euthalia aconthea	DSC_8547
PM1271	grey card	2017-05-25	Pongumoodu	Euthalia aconthea	DSC_8513
PM1298	grey card	2017-09-28	Pongumoodu	Euthalia aconthea	DSC_0251
PM1308	grey card	2017-09-28	Pongumoodu	Euthalia aconthea	DSC_0234
PM1366	wild	2016-05-29	Pongumoodu	Euthalia aconthea	DSC_3954
PM1413	grey card	2017-11-29	Pongumoodu	Euthalia aconthea	DSC_0357
TP19	grey card	2017-02-03	Technopark	Euthalia aconthea	DSC_6425
TP98	grey card	2018-02-08	Technopark	Euthalia aconthea	DSC_1617
TP116	grey card	2018-02-08	Technopark	Euthalia aconthea	DSC_1596
TP326	grey card	2018-02-08	Technopark	Euthalia aconthea	DSC_1339
TP335	grey card	2018-02-08	Technopark	Euthalia aconthea	DSC_1329	DSC_1328
TP426	grey card	2017-03-09	Technopark	Euthalia aconthea	DSC_6877
TP444	grey card	2017-05-09	Technopark	Euthalia aconthea	DSC_8114
TP446	grey card	2017-05-09	Technopark	Euthalia aconthea	DSC_8110
TP448	grey card	2017-05-09	Technopark	Euthalia aconthea	DSC_8108
TP449	grey card	2017-05-09	Technopark	Euthalia aconthea	DSC_8107
TP453	grey card	2017-05-09	Technopark	Euthalia aconthea	DSC_8101
TP454	grey card	2017-05-09	Technopark	Euthalia aconthea	DSC_8098	DSC_8097
TP474	grey card	2016-12-09	Technopark	Euthalia aconthea	DSC_0122
TP476	grey card	2016-12-09	Technopark	Euthalia aconthea	DSC_0118
TP477	grey card	2016-12-09	Technopark	Euthalia aconthea	DSC_0117
TP495	grey card	2016-12-09	Technopark	Euthalia aconthea	DSC_0073
TP506	grey card	2016-12-09	Technopark	Euthalia aconthea	DSC_0047
TP552	grey card	2017-04-11	Technopark	Euthalia aconthea	DSC_7458	DSC_7457
TP558	grey card	2017-05-11	Technopark	Euthalia aconthea	DSC_8243	DSC_8242
TP636	grey card	2017-12-20	Technopark	Euthalia aconthea	DSC_0530
TP640	grey card	2017-12-20	Technopark	Euthalia aconthea	DSC_0525	DSC_0524
TP671	grey card	2017-12-20	Technopark	Euthalia aconthea	DSC_0484
TP674	grey card	2017-12-20	Technopark	Euthalia aconthea	DSC_0481	DSC_0480-0479
TP675	grey card	2017-12-20	Technopark	Euthalia aconthea	DSC_0478
TP676	grey card	2017-12-20	Technopark	Euthalia aconthea	DSC_0477
TP677	grey card	2017-12-20	Technopark	Euthalia aconthea	DSC_0476
TP685	grey card	2017-12-20	Technopark	Euthalia aconthea	DSC_0466
TP691	grey card	2017-12-20	Technopark	Euthalia aconthea	DSC_0458
TP699	grey card	2017-12-20	Technopark	Euthalia aconthea	DSC_0448
TP706	grey card	2017-12-20	Technopark	Euthalia aconthea	DSC_0441
TP724	grey card	2017-12-20	Technopark	Euthalia aconthea	DSC_0419
TP781	grey card	2017-12-21	Technopark	Euthalia aconthea	DSC_0603
TP829	grey card	2018-03-22	Technopark	Euthalia aconthea	DSC_2039
TP832	grey card	2018-03-22	Technopark	Euthalia aconthea	DSC_2034
TP833	grey card	2018-03-22	Technopark	Euthalia aconthea	DSC_2033
TP876	grey card	2018-03-22	Technopark	Euthalia aconthea	DSC_1977
TP881	grey card	2018-03-22	Technopark	Euthalia aconthea	DSC_1969
TP891	grey card	2018-03-22	Technopark	Euthalia aconthea	DSC_1958
TP892	grey card	2018-03-22	Technopark	Euthalia aconthea	DSC_1957
TP893	grey card	2018-03-22	Technopark	Euthalia aconthea	DSC_1956
TP935	grey card	2017-01-24	Technopark	Euthalia aconthea	DSC_6009
TP960	grey card	2017-07-24	Technopark	Euthalia aconthea	DSC_9444
TP1051	grey card	2017-07-24	Technopark	Euthalia aconthea	DSC_9321
TP1055	grey card	2017-07-24	Technopark	Euthalia aconthea	DSC_9317
TP1056	grey card	2017-07-24	Technopark	Euthalia aconthea	DSC_9316
TP1175	grey card	2017-07-24	Technopark	Euthalia aconthea	DSC_9160
TP1177	grey card	2017-07-24	Technopark	Euthalia aconthea	DSC_9158
TP1178	grey card	2017-07-24	Technopark	Euthalia aconthea	DSC_9157
TP1179	grey card	2017-07-24	Technopark	Euthalia aconthea	DSC_9156
TP1180	grey card	2017-07-24	Technopark	Euthalia aconthea	DSC_9155
TP1181	grey card	2017-07-24	Technopark	Euthalia aconthea	DSC_9154
TP1186	grey card	2017-07-24	Technopark	Euthalia aconthea	DSC_9149
TP1187	grey card	2017-07-24	Technopark	Euthalia aconthea	DSC_9148
TP1188	grey card	2017-07-24	Technopark	Euthalia aconthea	DSC_9147
TP1250	grey card	2017-08-25	Technopark	Euthalia aconthea	DSC_9932
TP1252	grey card	2017-08-25	Technopark	Euthalia aconthea	DSC_9929
TP1273	grey card	2017-08-25	Technopark	Euthalia aconthea	DSC_9898	DSC_9897
TP1293	grey card	2017-08-25	Technopark	Euthalia aconthea	DSC_9875
TP1295	grey card	2017-08-25	Technopark	Euthalia aconthea	DSC_9873
TP1297	grey card	2017-08-25	Technopark	Euthalia aconthea	DSC_9871
TP1323	grey card	2017-08-25	Technopark	Euthalia aconthea	DSC_9835
TP1324	grey card	2017-08-25	Technopark	Euthalia aconthea	DSC_9834
TP1326	grey card	2017-08-25	Technopark	Euthalia aconthea	DSC_9831
TP1331	grey card	2017-08-25	Technopark	Euthalia aconthea	DSC_9825	DSC_9824
TP1358	grey card	2017-08-25	Technopark	Euthalia aconthea	DSC_9784
TP1359	grey card	2017-08-25	Technopark	Euthalia aconthea	DSC_9783
TP1360	grey card	2017-08-25	Technopark	Euthalia aconthea	DSC_9782
TP1402	grey card	2017-08-26	Technopark	Euthalia aconthea	DSC_9983	DSC_9982
TP1429	grey card	2017-08-26	Technopark	Euthalia aconthea	DSC_0139
TP1451	grey card	2017-08-26	Technopark	Euthalia aconthea	DSC_0114
TP1455	grey card	2017-08-26	Technopark	Euthalia aconthea	DSC_0110
TP1500	grey card	2017-08-26	Technopark	Euthalia aconthea	DSC_0056	DSC_0055
TP1517	grey card	2017-08-26	Technopark	Euthalia aconthea	DSC_0029
PM258	wild	2016-08-03	Pongumoodu	Euthalia lubentina	DSC_4603	DSC_4600
PM259	grey card	2016-08-03	Pongumoodu	Euthalia lubentina	DSC_4598
TP491	grey card	2016-12-09	Technopark	Euthalia lubentina	DSC_0088	DSC_0087
TP568	grey card	2017-04-12	Technopark	Euthalia lubentina	DSC_7552
PM538	grey card	2017-07-11	Pongumoodu	Hypolimnas bolina	DSC_8966
PM791	grey card	2016-06-20	Pongumoodu	Hypolimnas bolina	DSC_4303
PM796	grey card	2016-06-20	Pongumoodu	Hypolimnas bolina	DSC_4298
PM885	grey card	2017-02-22	Pongumoodu	Hypolimnas bolina	DSC_6658
PM982	grey card	2016-06-22	Pongumoodu	Hypolimnas bolina	DSC_0077
PM1310	grey card	2017-09-28	Pongumoodu	Hypolimnas bolina	DSC_0232
PM1453	grey card	2017-01-31	Pongumoodu	Hypolimnas bolina	DSC_6320	DSC_6319
TP388	grey card	2017-03-08	Technopark	Hypolimnas bolina	DSC_6818	DSC_6817-6816
TP404	wild	2016-12-08	Technopark	Hypolimnas bolina	DSC_0072	DSC_0071-0070
TP475	grey card	2016-12-09	Technopark	Hypolimnas bolina	DSC_0121
TP502	grey card	2016-12-09	Technopark	Hypolimnas bolina	DSC_0056
TP513	grey card	2016-12-09	Technopark	Hypolimnas bolina	DSC_0033
TP544	grey card	2017-05-10	Technopark	Hypolimnas bolina	DSC_8150
TP750	grey card	2017-12-21	Technopark	Hypolimnas bolina	DSC_0649
TP1074	grey card	2017-07-24	Technopark	Hypolimnas bolina	DSC_9292
TP1118	grey card	2017-07-24	Technopark	Hypolimnas bolina	DSC_9224
TP1147	grey card	2017-07-24	Technopark	Hypolimnas bolina	DSC_9191
TP1307	grey card	2017-08-25	Technopark	Hypolimnas bolina	DSC_9858
TP1317	grey card	2017-08-25	Technopark	Hypolimnas bolina	DSC_9846
TP1373	grey card	2017-08-25	Technopark	Hypolimnas bolina	DSC_9766
PM376	grey card	2016-10-06	Pongumoodu	Hypolimnas misippus	DSC_0003
PM117	grey card	2018-03-01	Pongumoodu	Junonia atlites	DSC_1669
PM147	grey card	2016-08-02	Pongumoodu	Junonia atlites	DSC_4570	DSC_4569
PM157	grey card	2016-08-02	Pongumoodu	Junonia atlites	DSC_4559
PM227	grey card	2016-08-03	Pongumoodu	Junonia atlites	DSC_4657
PM321	grey card	2016-10-05	Pongumoodu	Junonia atlites	DSC_0128	DSC_0127
PM360	grey card	2016-10-06	Pongumoodu	Junonia atlites	DSC_0022
PM452	wild	2017-08-08	Pongumoodu	Junonia atlites	DSC_9711	DSC_9710
PM485	grey card	2017-07-11	Pongumoodu	Junonia atlites	DSC_9022
PM486	grey card	2017-07-11	Pongumoodu	Junonia atlites	DSC_9021
PM493	grey card	2017-07-11	Pongumoodu	Junonia atlites	DSC_9014
PM498	grey card	2017-07-11	Pongumoodu	Junonia atlites	DSC_9009
PM521	grey card	2017-07-11	Pongumoodu	Junonia atlites	DSC_8983
PM588	grey card	2017-07-11	Pongumoodu	Junonia atlites	DSC_8913
PM682	grey card	2016-06-19	Pongumoodu	Junonia atlites	DSC_4251
PM999	grey card	2016-11-22	Pongumoodu	Junonia atlites	DSC_0063
PM1272	grey card	2017-05-25	Pongumoodu	Junonia atlites	DSC_8512
PM1281	grey card	2017-09-28	Pongumoodu	Junonia atlites	DSC_0281
PM1322	grey card	2017-09-28	Pongumoodu	Junonia atlites	DSC_0217
PM1327	grey card	2017-09-27	Pongumoodu	Junonia atlites	DSC_0209
TP59	grey card	2017-06-07	Technopark	Junonia atlites	DSC_8786
TP399	grey card	2016-12-08	Technopark	Junonia atlites	DSC_0080
TP970	grey card	2017-07-24	Technopark	Junonia atlites	DSC_9431
TP980	wild	2017-07-24	Technopark	Junonia atlites	DSC_9418	From DSC_9417 to DSC_9410
TP1044	grey card	2017-07-24	Technopark	Junonia atlites	DSC_9332
TP1151	grey card	2017-07-24	Technopark	Junonia atlites	DSC_9186
PM12	grey card	2017-06-01	Pongumoodu	Junonia iphita	DSC_8681
PM13	grey card	2017-06-01	Pongumoodu	Junonia iphita	DSC_8680
PM72	grey card	2018-03-01	Pongumoodu	Junonia iphita	DSC_1728
PM73	grey card	2018-03-01	Pongumoodu	Junonia iphita	DSC_1727
PM79	grey card	2018-03-01	Pongumoodu	Junonia iphita	DSC_1721
PM92	grey card	2018-03-01	Pongumoodu	Junonia iphita	DSC_1705
PM151	grey card	2016-08-02	Pongumoodu	Junonia iphita	DSC_4565
PM154	grey card	2016-08-02	Pongumoodu	Junonia iphita	DSC_4562
PM155	grey card	2016-08-02	Pongumoodu	Junonia iphita	DSC_4561
PM158	grey card	2016-08-02	Pongumoodu	Junonia iphita	DSC_4557
PM159	grey card	2016-08-02	Pongumoodu	Junonia iphita	DSC_4556
PM162	grey card	2016-08-02	Pongumoodu	Junonia iphita	DSC_4553
PM173	grey card	2016-08-02	Pongumoodu	Junonia iphita	DSC_4539
PM175	grey card	2016-08-02	Pongumoodu	Junonia iphita	DSC_4536
PM188	grey card	2017-02-02	Pongumoodu	Junonia iphita	DSC_6396
PM209	grey card	2017-02-02	Pongumoodu	Junonia iphita	DSC_6359
PM216	grey card	2017-02-02	Pongumoodu	Junonia iphita	DSC_6346
PM233	grey card	2016-08-03	Pongumoodu	Junonia iphita	DSC_4651
PM242	grey card	2016-08-03	Pongumoodu	Junonia iphita	DSC_4634	DSC_4633
PM251	grey card	2016-08-03	Pongumoodu	Junonia iphita	DSC_4613
PM253	grey card	2016-08-03	Pongumoodu	Junonia iphita	DSC_4611
PM262	grey card	2016-08-03	Pongumoodu	Junonia iphita	DSC_4595
PM285	grey card	2016-10-05	Pongumoodu	Junonia iphita	DSC_0190
PM298	grey card	2016-10-05	Pongumoodu	Junonia iphita	DSC_0171
PM329	grey card	2016-10-04	Pongumoodu	Junonia iphita	DSC_0096
PM330	grey card	2016-10-04	Pongumoodu	Junonia iphita	DSC_0095
PM380	grey card	2016-10-05	Pongumoodu	Junonia iphita	DSC_0190
PM392	grey card	2016-10-05	Pongumoodu	Junonia iphita	DSC_0171
PM408	wild	2017-05-05	Pongumoodu	Junonia iphita	DSC_7978
PM409	grey card	2017-05-05	Pongumoodu	Junonia iphita	DSC_7977	DSC_7976
PM421	grey card	2017-05-06	Pongumoodu	Junonia iphita	DSC_8061
PM455	grey card	2017-08-08	Pongumoodu	Junonia iphita	DSC_9707
PM463	grey card	2017-08-08	Pongumoodu	Junonia iphita	DSC_9698
PM514	grey card	2017-07-11	Pongumoodu	Junonia iphita	DSC_8991
PM516	grey card	2017-07-11	Pongumoodu	Junonia iphita	DSC_8989
PM519	grey card	2017-07-11	Pongumoodu	Junonia iphita	DSC_8986	DSC_8985
PM533	grey card	2017-07-11	Pongumoodu	Junonia iphita	DSC_8971
PM565	grey card	2017-07-11	Pongumoodu	Junonia iphita	DSC_8937
PM566	grey card	2017-07-11	Pongumoodu	Junonia iphita	DSC_8936
PM576	grey card	2017-07-11	Pongumoodu	Junonia iphita	DSC_8926
PM592	grey card	2017-07-11	Pongumoodu	Junonia iphita	DSC_8904
PM593	grey card	2017-07-11	Pongumoodu	Junonia iphita	DSC_8903
PM609	grey card	2017-07-11	Pongumoodu	Junonia iphita	DSC_8881
PM610	grey card	2017-07-11	Pongumoodu	Junonia iphita	DSC_8880
PM611	grey card	2017-07-11	Pongumoodu	Junonia iphita	DSC_8879
PM616	grey card	2017-07-11	Pongumoodu	Junonia iphita	DSC_8874
PM628	grey card	2017-07-11	Pongumoodu	Junonia iphita	DSC_8860
PM658	grey card	2017-07-11	Pongumoodu	Junonia iphita	DSC_8816
PM660	grey card	2017-07-11	Pongumoodu	Junonia iphita	DSC_8814
PM663	grey card	2017-07-11	Pongumoodu	Junonia iphita	DSC_8811
PM664	grey card	2017-07-11	Pongumoodu	Junonia iphita	DSC_8810
PM680	grey card	2016-06-19	Pongumoodu	Junonia iphita	DSC_4254
PM706	grey card	2016-06-19	Pongumoodu	Junonia iphita	DSC_4205	DSC_4204
PM740	grey card	2017-01-20	Pongumoodu	Junonia iphita	DSC_5875
PM751	grey card	2016-06-20	Pongumoodu	Junonia iphita	DSC_4361
PM752	grey card	2016-06-20	Pongumoodu	Junonia iphita	DSC_4360
PM753	grey card	2016-06-20	Pongumoodu	Junonia iphita	DSC_4359
PM783	grey card	2016-06-20	Pongumoodu	Junonia iphita	DSC_4320
PM790	grey card	2016-06-20	Pongumoodu	Junonia iphita	DSC_4305
PM792	grey card	2016-06-20	Pongumoodu	Junonia iphita	DSC_4302
PM804	grey card	2017-01-21	Pongumoodu	Junonia iphita	DSC_5933
PM810	grey card	2016-06-21	Pongumoodu	Junonia iphita	DSC_0070
PM811	grey card	2016-06-21	Pongumoodu	Junonia iphita	DSC_0069
PM812	grey card	2016-06-21	Pongumoodu	Junonia iphita	DSC_0068
PM834	grey card	2016-06-21	Pongumoodu	Junonia iphita	DSC_0034		damage seems much more extensive, e.g. almost 50% of left forewing is missing
PM844	grey card	2016-06-21	Pongumoodu	Junonia iphita	DSC_0018
PM862	grey card	2017-02-23	Pongumoodu	Junonia iphita	DSC_6703
PM874	grey card	2017-02-22	Pongumoodu	Junonia iphita	DSC_6674
PM892	grey card	2017-02-22	Pongumoodu	Junonia iphita	DSC_6645
PM897	grey card	2017-02-22	Pongumoodu	Junonia iphita	DSC_6636
PM900	grey card	2017-02-22	Pongumoodu	Junonia iphita	DSC_6632
PM902	grey card	2017-02-22	Pongumoodu	Junonia iphita	DSC_6628
PM915	grey card	2017-02-22	Pongumoodu	Junonia iphita	DSC_0158
PM916	grey card	2016-06-22	Pongumoodu	Junonia iphita	DSC_0157
PM917	grey card	2016-06-22	Pongumoodu	Junonia iphita	DSC_0156
PM928	grey card	2016-06-22	Pongumoodu	Junonia iphita	DSC_0145
PM935	grey card	2016-06-22	Pongumoodu	Junonia iphita	DSC_0137
PM947	grey card	2016-06-22	Pongumoodu	Junonia iphita	DSC_0118
PM959	grey card	2016-06-22	Pongumoodu	Junonia iphita	DSC_0105
PM975	grey card	2016-06-22	Pongumoodu	Junonia iphita	DSC_0087
PM978	grey card	2016-06-22	Pongumoodu	Junonia iphita	DSC_0081
PM979	grey card	2016-06-22	Pongumoodu	Junonia iphita	DSC_0080
PM1022	grey card	2016-11-22	Pongumoodu	Junonia iphita	DSC_0024
PM1104	grey card	2017-03-24	Pongumoodu	Junonia iphita	DSC_7305
PM1114	grey card	2017-05-24	Pongumoodu	Junonia iphita	DSC_8505	DSC_8504
PM1117	grey card	2017-05-24	Pongumoodu	Junonia iphita	DSC_8499
PM1119	grey card	2017-05-24	Pongumoodu	Junonia iphita	DSC_8497
PM1126	grey card	2017-05-24	Pongumoodu	Junonia iphita	DSC_8486
PM1135	grey card	2017-05-24	Pongumoodu	Junonia iphita	DSC_8466
PM1219	grey card	2017-05-25	Pongumoodu	Junonia iphita	DSC_8590	DSC_8589
PM1226	grey card	2017-05-25	Pongumoodu	Junonia iphita	DSC_8580
PM1228	grey card	2017-05-25	Pongumoodu	Junonia iphita	DSC_8578
PM1230	grey card	2017-05-25	Pongumoodu	Junonia iphita	DSC_8576
PM1255	grey card	2017-05-25	Pongumoodu	Junonia iphita	DSC_8534
PM1259	grey card	2017-05-25	Pongumoodu	Junonia iphita	DSC_8526
PM1269	grey card	2017-05-25	Pongumoodu	Junonia iphita	DSC_8516	DSC_8515
PM1309	grey card	2017-09-28	Pongumoodu	Junonia iphita	DSC_0233
PM1320	grey card	2017-09-28	Pongumoodu	Junonia iphita	DSC_0220	DSC_0219
PM1333	grey card	2017-09-27	Pongumoodu	Junonia iphita	DSC_0197
PM1352	grey card	2017-09-27	Pongumoodu	Junonia iphita	DSC_0161	DSC_0160-DSC_0159
PM1367	wild	2016-05-29	Pongumoodu	Junonia iphita	DSC_3952
PM1400	grey card	2017-11-29	Pongumoodu	Junonia iphita	DSC_0373
TP46	grey card	2017-03-07	Technopark	Junonia iphita	DSC_6766	DSC_6765
TP53	grey card	2017-06-07	Technopark	Junonia iphita	DSC_8796	DSC_8795
TP54	grey card	2017-06-07	Technopark	Junonia iphita	DSC_8794	DSC_8793
TP64	grey card	2017-06-07	Technopark	Junonia iphita	DSC_8780
TP71	grey card	2017-06-07	Technopark	Junonia iphita	DSC_8767
TP75	grey card	2017-06-07	Technopark	Junonia iphita	DSC_8761
TP78	grey card	2017-06-07	Technopark	Junonia iphita	DSC_8758
TP193	grey card	2018-02-08	Technopark	Junonia iphita	DSC_1501
TP227	grey card	2018-02-08	Technopark	Junonia iphita	DSC_1457
TP260	grey card	2018-02-08	Technopark	Junonia iphita	DSC_1418
TP305	grey card	2018-02-08	Technopark	Junonia iphita	DSC_1362
TP382	grey card	2017-03-08	Technopark	Junonia iphita	DSC_6827
TP386	grey card	2017-03-08	Technopark	Junonia iphita	DSC_6820
TP409	wild	2016-12-08	Technopark	Junonia iphita	DSC_0053
TP416	grey card	2016-12-08	Technopark	Junonia iphita	DSC_0019
TP436	grey card	2017-05-09	Technopark	Junonia iphita	DSC_8132	DSC_8131-8130
TP437	grey card	2017-05-09	Technopark	Junonia iphita	DSC_8129	DSC_8128-8127
TP442	grey card	2017-05-09	Technopark	Junonia iphita	DSC_8117	DSC_8116
TP457	grey card	2017-05-09	Technopark	Junonia iphita	DSC_8090	DSC_8089
TP504	grey card	2016-12-09	Technopark	Junonia iphita	DSC_0050
TP505	grey card	2016-12-09	Technopark	Junonia iphita	DSC_0048
TP529	grey card	2017-05-10	Technopark	Junonia iphita	DSC_8215
TP538	grey card	2017-05-10	Technopark	Junonia iphita	DSC_8184	From DSC-8183-8178
TP539	grey card	2017-05-10	Technopark	Junonia iphita	DSC_8176	DSC_8175
TP542	grey card	2017-05-10	Technopark	Junonia iphita	DSC_8155
TP543	grey card	2017-05-10	Technopark	Junonia iphita	DSC_8153	DSC_8152
TP548	grey card	2017-05-10	Technopark	Junonia iphita	DSC_8143	DSC_8142-8141
TP549	grey card	2017-05-10	Technopark	Junonia iphita	DSC_8140
TP555	grey card	2017-04-11	Technopark	Junonia iphita	DSC_7447
TP574	grey card	2017-04-12	Technopark	Junonia iphita	DSC_7523
TP622	grey card	2017-12-20	Technopark	Junonia iphita	DSC_0549
TP688	grey card	2017-12-20	Technopark	Junonia iphita	DSC_0462
TP827	grey card	2018-03-22	Technopark	Junonia iphita	DSC_2041
TP856	grey card	2018-03-22	Technopark	Junonia iphita	DSC_2006
TP866	grey card	2018-03-22	Technopark	Junonia iphita	DSC_1992
TP867	grey card	2018-03-22	Technopark	Junonia iphita	DSC_1991
TP868	grey card	2018-03-22	Technopark	Junonia iphita	DSC_1990
TP906	grey card	2017-01-24	Technopark	Junonia iphita	DSC_6047
TP907	grey card	2017-01-24	Technopark	Junonia iphita	DSC_6045
TP908	grey card	2017-01-24	Technopark	Junonia iphita	DSC_6044
TP909	grey card	2017-01-24	Technopark	Junonia iphita	DSC_6043
TP920	grey card	2017-01-24	Technopark	Junonia iphita	DSC_6031
TP966	grey card	2017-07-24	Technopark	Junonia iphita	DSC_9435
TP982	grey card	2017-07-24	Technopark	Junonia iphita	DSC_9408
TP994	grey card	2017-07-24	Technopark	Junonia iphita	DSC_9396
TP999	grey card	2017-07-24	Technopark	Junonia iphita	DSC_9390
TP1009	grey card	2017-07-24	Technopark	Junonia iphita	DSC_9378
TP1011	grey card	2017-07-24	Technopark	Junonia iphita	DSC_9375
TP1012	grey card	2017-07-24	Technopark	Junonia iphita	DSC_9374	DSC_9373
TP1014	grey card	2017-07-24	Technopark	Junonia iphita	DSC_9371
TP1015	grey card	2017-07-24	Technopark	Junonia iphita	DSC_9370
TP1018	grey card	2017-07-24	Technopark	Junonia iphita	DSC_9367
TP1020	grey card	2017-07-24	Technopark	Junonia iphita	DSC_9365	DSC_9364
TP1025	grey card	2017-07-24	Technopark	Junonia iphita	DSC_9358
TP1027	grey card	2017-07-24	Technopark	Junonia iphita	DSC_9356
TP1037	grey card	2017-07-24	Technopark	Junonia iphita	DSC_9346
TP1039	grey card	2017-07-24	Technopark	Junonia iphita	DSC_9338
TP1043	grey card	2017-07-24	Technopark	Junonia iphita	DSC_9334	DSC_9333
TP1045	wild	2017-07-24	Technopark	Junonia iphita	DSC_9330
TP1049	grey card	2017-07-24	Technopark	Junonia iphita	DSC_9323
TP1058	grey card	2017-07-24	Technopark	Junonia iphita	DSC_9314
TP1069	grey card	2017-07-24	Technopark	Junonia iphita	DSC_9297
TP1070	grey card	2017-07-24	Technopark	Junonia iphita	DSC_9296
TP1082	wild	2017-07-24	Technopark	Junonia iphita	DSC_9274
TP1094	grey card	2017-07-24	Technopark	Junonia iphita	DSC_9258
TP1096	grey card	2017-07-24	Technopark	Junonia iphita	DSC_9256
TP1107	grey card	2017-07-24	Technopark	Junonia iphita	DSC_9236	DSC_9235
TP1108	grey card	2017-07-24	Technopark	Junonia iphita	DSC_9234
TP1112	grey card	2017-07-24	Technopark	Junonia iphita	DSC_9230
TP1114	grey card	2017-07-24	Technopark	Junonia iphita	DSC_9228
TP1115	grey card	2017-07-24	Technopark	Junonia iphita	DSC_9227
TP1116	grey card	2017-07-24	Technopark	Junonia iphita	DSC_9226
TP1121	grey card	2017-07-24	Technopark	Junonia iphita	DSC_9220
TP1126	grey card	2017-07-24	Technopark	Junonia iphita	DSC_9215
TP1138	grey card	2017-07-24	Technopark	Junonia iphita	DSC_9202
TP1141	grey card	2017-07-24	Technopark	Junonia iphita	DSC_9199
TP1143	grey card	2017-07-24	Technopark	Junonia iphita	DSC_9196
TP1144	grey card	2017-07-24	Technopark	Junonia iphita	DSC_9195
TP1150	grey card	2017-07-24	Technopark	Junonia iphita	DSC_9187
TP1153	grey card	2017-07-24	Technopark	Junonia iphita	DSC_9184
TP1159	grey card	2017-07-24	Technopark	Junonia iphita	DSC_9177
TP1161	grey card	2017-07-24	Technopark	Junonia iphita	DSC_9175
TP1162	grey card	2017-07-24	Technopark	Junonia iphita	DSC_9174
TP1189	grey card	2017-07-24	Technopark	Junonia iphita	DSC_9142
TP1203	wild	2017-07-24	Technopark	Junonia iphita	DSC_9108	DSC_9107
TP1205	grey card	2017-01-25	Technopark	Junonia iphita	DSC_6142
TP1240	grey card	2017-08-25	Technopark	Junonia iphita	DSC_9946
TP1256	grey card	2017-08-25	Technopark	Junonia iphita	DSC_9925	DSC_9924
TP1257	grey card	2017-08-25	Technopark	Junonia iphita	DSC_9923	DSC_9922
TP1259	grey card	2017-08-25	Technopark	Junonia iphita	DSC_9917	DSC_9916
TP1262	grey card	2017-08-25	Technopark	Junonia iphita	DSC_9913
TP1266	grey card	2017-08-25	Technopark	Junonia iphita	DSC_9908	DSC_9907
TP1267	grey card	2017-08-25	Technopark	Junonia iphita	DSC_9906
TP1272	grey card	2017-08-25	Technopark	Junonia iphita	DSC_9899
TP1283	grey card	2017-08-25	Technopark	Junonia iphita	DSC_9886
TP1286	grey card	2017-08-25	Technopark	Junonia iphita	DSC_9882	DSC_9883
TP1299	grey card	2017-08-25	Technopark	Junonia iphita	DSC_9868
TP1300	grey card	2017-08-25	Technopark	Junonia iphita	DSC_9867	DSC_9866
TP1342	grey card	2017-08-25	Technopark	Junonia iphita	DSC_9808
TP1346	grey card	2017-08-25	Technopark	Junonia iphita	DSC_9798	DSC_9797
TP1347	grey card	2017-08-25	Technopark	Junonia iphita	DSC_9796
TP1353	grey card	2017-08-25	Technopark	Junonia iphita	DSC_9790	DSC_9789
TP1356	grey card	2017-08-25	Technopark	Junonia iphita	DSC_9786
TP1398	grey card	2017-08-26	Technopark	Junonia iphita	DSC_9988
TP1399	grey card	2017-08-26	Technopark	Junonia iphita	DSC_9987	DSC_9986
TP1406	grey card	2017-08-26	Technopark	Junonia iphita	DSC_9977
TP1452	grey card	2017-08-26	Technopark	Junonia iphita	DSC_0113
TP1458	grey card	2017-08-26	Technopark	Junonia iphita	DSC_0107
TP1465	grey card	2017-08-26	Technopark	Junonia iphita	DSC_0095
TP1466	grey card	2017-08-26	Technopark	Junonia iphita	DSC_0094
TP1467	grey card	2017-08-26	Technopark	Junonia iphita	DSC_0093
TP1495	grey card	2017-08-26	Technopark	Junonia iphita	DSC_0061
TP1498	grey card	2017-08-26	Technopark	Junonia iphita	DSC_0058
TP1507	wild	2017-08-26	Technopark	Junonia iphita	DSC_0043	DSC_0042
TP1520	grey card	2017-08-26	Technopark	Junonia iphita	DSC_0025	DSC_0024
PM375	grey card	2016-10-06	Pongumoodu	Junonia lemonias	DSC_0004
TP34	wild	2017-02-03	Technopark	Junonia lemonias	DSC_6406	DSC_6405
TP83	grey card	2017-06-07	Technopark	Junonia lemonias	DSC_8730	DSC_8729
TP597	grey card	2016-11-15	Technopark	Junonia lemonias	DSC_0046
TP950	wild	2017-01-24	Technopark	Junonia lemonias	DSC_5973
TP882	grey card	2018-03-22	Technopark	Kaniska canace	DSC_1968
PM657	grey card	2017-07-11	Pongumoodu	Lambrix salsala	DSC_8822	From DSC_8821 To DSC_8817
PM957	grey card	2016-06-22	Pongumoodu	Lethe drypetis	DSC_0107
PM6	grey card	2017-06-01	Pongumoodu	Melanitis leda	DSC_8690
PM14	grey card	2018-03-01	Pongumoodu	Melanitis leda	DSC_1802
PM18	grey card	2018-03-01	Pongumoodu	Melanitis leda	DSC_1798
PM19	grey card	2018-03-01	Pongumoodu	Melanitis leda	DSC_1797
PM20	grey card	2018-03-01	Pongumoodu	Melanitis leda	DSC_1796	DSC_1795
PM21	grey card	2018-03-01	Pongumoodu	Melanitis leda	DSC_1794
PM22	grey card	2018-03-01	Pongumoodu	Melanitis leda	DSC_1793
PM23	grey card	2018-03-01	Pongumoodu	Melanitis leda	DSC_1792
PM24	grey card	2018-03-01	Pongumoodu	Melanitis leda	DSC_1791
PM27	grey card	2018-03-01	Pongumoodu	Melanitis leda	DSC_1786
PM30	grey card	2018-03-01	Pongumoodu	Melanitis leda	DSC_1783
PM32	grey card	2018-03-01	Pongumoodu	Melanitis leda	DSC_1780
PM33	grey card	2018-03-01	Pongumoodu	Melanitis leda	DSC_1779
PM36	grey card	2018-03-01	Pongumoodu	Melanitis leda	DSC_1776
PM37	grey card	2018-03-01	Pongumoodu	Melanitis leda	DSC_1775
PM38	grey card	2018-03-01	Pongumoodu	Melanitis leda	DSC_1774
PM39	grey card	2018-03-01	Pongumoodu	Melanitis leda	DSC_1773
PM41	grey card	2018-03-01	Pongumoodu	Melanitis leda	DSC_1771
PM42	grey card	2018-03-01	Pongumoodu	Melanitis leda	DSC_1770
PM43	grey card	2018-03-01	Pongumoodu	Melanitis leda	DSC_1769
PM44	grey card	2018-03-01	Pongumoodu	Melanitis leda	DSC_1768
PM45	grey card	2018-03-01	Pongumoodu	Melanitis leda	DSC_1767
PM49	grey card	2018-03-01	Pongumoodu	Melanitis leda	DSC_1762
PM52	grey card	2018-03-01	Pongumoodu	Melanitis leda	DSC_1756
PM53	grey card	2018-03-01	Pongumoodu	Melanitis leda	DSC_1755
PM54	grey card	2018-03-01	Pongumoodu	Melanitis leda	DSC_1754
PM55	grey card	2018-03-01	Pongumoodu	Melanitis leda	DSC_1753
PM56	grey card	2018-03-01	Pongumoodu	Melanitis leda	DSC_1752
PM57	grey card	2018-03-01	Pongumoodu	Melanitis leda	DSC_1751
PM58	grey card	2018-03-01	Pongumoodu	Melanitis leda	DSC_1748
PM59	grey card	2018-03-01	Pongumoodu	Melanitis leda	DSC_1747
PM60	grey card	2018-03-01	Pongumoodu	Melanitis leda	DSC_1746
PM64	grey card	2018-03-01	Pongumoodu	Melanitis leda	DSC_1740
PM65	grey card	2018-03-01	Pongumoodu	Melanitis leda	DSC_1739
PM71	grey card	2018-03-01	Pongumoodu	Melanitis leda	DSC_1730	DSC_1729
PM75	grey card	2018-03-01	Pongumoodu	Melanitis leda	DSC_1725
PM77	grey card	2018-03-01	Pongumoodu	Melanitis leda	DSC_1723
PM78	grey card	2018-03-01	Pongumoodu	Melanitis leda	DSC_1722
PM81	grey card	2018-03-01	Pongumoodu	Melanitis leda	DSC_1719
PM82	grey card	2018-03-01	Pongumoodu	Melanitis leda	DSC_1718
PM83	grey card	2018-03-01	Pongumoodu	Melanitis leda	DSC_1717
PM84	grey card	2018-03-01	Pongumoodu	Melanitis leda	DSC_1716
PM87	grey card	2018-03-01	Pongumoodu	Melanitis leda	DSC_1710
PM89	grey card	2018-03-01	Pongumoodu	Melanitis leda	DSC_1708
PM91	grey card	2018-03-01	Pongumoodu	Melanitis leda	DSC_1706
PM93	grey card	2018-03-01	Pongumoodu	Melanitis leda	DSC_1702
PM95	grey card	2018-03-01	Pongumoodu	Melanitis leda	DSC_1700	DSC_1698
PM97	grey card	2018-03-01	Pongumoodu	Melanitis leda	DSC_1696
PM98	grey card	2018-03-01	Pongumoodu	Melanitis leda	DSC_1695
PM99	grey card	2018-03-01	Pongumoodu	Melanitis leda	DSC_1694
PM101	grey card	2018-03-01	Pongumoodu	Melanitis leda	DSC_1692
PM102	grey card	2018-03-01	Pongumoodu	Melanitis leda	DSC_1691
PM103	grey card	2018-03-01	Pongumoodu	Melanitis leda	DSC_1690
PM105	grey card	2018-03-01	Pongumoodu	Melanitis leda	DSC_1688
PM108	grey card	2018-03-01	Pongumoodu	Melanitis leda	DSC_1683
PM109	grey card	2018-03-01	Pongumoodu	Melanitis leda	DSC_1682
PM111	grey card	2018-03-01	Pongumoodu	Melanitis leda	DSC_1680
PM112	grey card	2018-03-01	Pongumoodu	Melanitis leda	DSC_1679
PM113	grey card	2018-03-01	Pongumoodu	Melanitis leda	DSC_1678
PM114	grey card	2018-03-01	Pongumoodu	Melanitis leda	DSC_1675
PM122	grey card	2018-03-01	Pongumoodu	Melanitis leda	DSC_1662	DSC_1661
PM123	grey card	2018-03-01	Pongumoodu	Melanitis leda	DSC_1659
PM124	grey card	2018-03-01	Pongumoodu	Melanitis leda	DSC_1658
PM125	grey card	2018-03-01	Pongumoodu	Melanitis leda	DSC_1656
PM126	grey card	2018-03-01	Pongumoodu	Melanitis leda	DSC_1655
PM127	grey card	2018-03-01	Pongumoodu	Melanitis leda	DSC_1654
PM128	grey card	2018-03-01	Pongumoodu	Melanitis leda	DSC_1652
PM129	grey card	2018-03-01	Pongumoodu	Melanitis leda	DSC_1651
PM130	grey card	2018-03-01	Pongumoodu	Melanitis leda	DSC_1649
PM131	grey card	2018-03-01	Pongumoodu	Melanitis leda	DSC_1648
PM132	grey card	2018-03-01	Pongumoodu	Melanitis leda	DSC_1647
PM133	grey card	2018-03-01	Pongumoodu	Melanitis leda	DSC_1646
PM134	grey card	2018-03-01	Pongumoodu	Melanitis leda	DSC_1645
PM135	grey card	2018-03-01	Pongumoodu	Melanitis leda	DSC_1644
PM136	grey card	2018-03-01	Pongumoodu	Melanitis leda	DSC_1643
PM138	grey card	2018-03-01	Pongumoodu	Melanitis leda	DSC_1640
PM140	grey card	2018-03-01	Pongumoodu	Melanitis leda	DSC_1638
PM141	grey card	2018-03-01	Pongumoodu	Melanitis leda	DSC_1637
PM142	grey card	2018-03-01	Pongumoodu	Melanitis leda	DSC_1636
PM145	grey card	2016-08-02	Pongumoodu	Melanitis leda	DSC_4572
PM146	grey card	2016-08-02	Pongumoodu	Melanitis leda	DSC_4571
PM153	grey card	2016-08-02	Pongumoodu	Melanitis leda	DSC_4563
PM156	grey card	2016-08-02	Pongumoodu	Melanitis leda	DSC_4560
PM163	grey card	2016-08-02	Pongumoodu	Melanitis leda	DSC_4552
PM165	grey card	2016-08-02	Pongumoodu	Melanitis leda	DSC_4550
PM166	grey card	2016-08-02	Pongumoodu	Melanitis leda	DSC_4549
PM170	wild	2016-08-02	Pongumoodu	Melanitis leda	DSC_4545	DSC_4544-4543
PM171	grey card	2016-08-02	Pongumoodu	Melanitis leda	DSC_4542
PM174	grey card	2016-08-02	Pongumoodu	Melanitis leda	DSC_4538	DSC_4537
PM178	grey card	2016-08-02	Pongumoodu	Melanitis leda	DSC_4533
PM186	wild	2016-06-02	Pongumoodu	Melanitis leda	DSC_3985	DSC_3984-3983
PM207	grey card	2017-02-02	Pongumoodu	Melanitis leda	DSC_6362
PM212	grey card	2017-02-02	Pongumoodu	Melanitis leda	DSC_6351
PM222	grey card	2017-02-02	Pongumoodu	Melanitis leda	DSC_6339
PM223	grey card	2016-08-03	Pongumoodu	Melanitis leda	DSC_4661
PM224	grey card	2016-08-03	Pongumoodu	Melanitis leda	DSC_4660
PM231	grey card	2016-08-03	Pongumoodu	Melanitis leda	DSC_4653
PM232	grey card	2016-08-03	Pongumoodu	Melanitis leda	DSC_4652
PM234	grey card	2016-08-03	Pongumoodu	Melanitis leda	DSC_4650
PM235	grey card	2016-08-03	Pongumoodu	Melanitis leda	DSC_4649
PM236	grey card	2016-08-03	Pongumoodu	Melanitis leda	DSC_4648
PM237	grey card	2016-08-03	Pongumoodu	Melanitis leda	DSC_4647	DSC_4646-4645-4644
PM238	grey card	2016-08-03	Pongumoodu	Melanitis leda	DSC_4643	DSC_4642
PM243	grey card	2016-08-03	Pongumoodu	Melanitis leda	DSC_4632
PM245	grey card	2016-08-03	Pongumoodu	Melanitis leda	DSC_4630	DSC_4629
PM246	grey card	2016-08-03	Pongumoodu	Melanitis leda	DSC_4628
PM247	grey card	2016-08-03	Pongumoodu	Melanitis leda	DSC_4627	DSC_4626
PM248	grey card	2016-08-03	Pongumoodu	Melanitis leda	DSC_4625
PM254	grey card	2016-08-03	Pongumoodu	Melanitis leda	DSC_4610	DSC_4609
PM255	grey card	2016-08-03	Pongumoodu	Melanitis leda	DSC_4608
PM256	grey card	2016-08-03	Pongumoodu	Melanitis leda	DSC_4607
PM281	grey card	2017-06-03	Pongumoodu	Melanitis leda	DSC_8708
PM300	grey card	2016-10-05	Pongumoodu	Melanitis leda	DSC_0161
PM301	grey card	2016-10-05	Pongumoodu	Melanitis leda	DSC_0160
PM303	grey card	2016-10-05	Pongumoodu	Melanitis leda	DSC_0158
PM308	grey card	2016-10-05	Pongumoodu	Melanitis leda	DSC_0149
PM309	grey card	2016-10-05	Pongumoodu	Melanitis leda	DSC_0147
PM310	grey card	2016-10-05	Pongumoodu	Melanitis leda	DSC_0146
PM314	grey card	2016-10-05	Pongumoodu	Melanitis leda	DSC_0141
PM316	grey card	2016-10-05	Pongumoodu	Melanitis leda	DSC_0139	DSC_0138-0137
PM318	grey card	2016-10-05	Pongumoodu	Melanitis leda	DSC_0132
PM320	grey card	2016-10-05	Pongumoodu	Melanitis leda	DSC_0130	DSC_0129
PM326	grey card	2016-10-04	Pongumoodu	Melanitis leda	DSC_0100
PM335	grey card	2016-10-04	Pongumoodu	Melanitis leda	DSC_0089
PM336	grey card	2016-10-04	Pongumoodu	Melanitis leda	DSC_0088
PM337	grey card	2016-10-04	Pongumoodu	Melanitis leda	DSC_0087
PM342	grey card	2016-10-04	Pongumoodu	Melanitis leda	DSC_0079
PM343	grey card	2016-10-04	Pongumoodu	Melanitis leda	DSC_0078
PM344	grey card	2016-10-04	Pongumoodu	Melanitis leda	DSC_0077	DSC_0076
PM345	grey card	2016-10-04	Pongumoodu	Melanitis leda	DSC_0075
PM350	grey card	2016-10-04	Pongumoodu	Melanitis leda	DSC_0068
PM351	grey card	2016-10-04	Pongumoodu	Melanitis leda	DSC_0067
PM357	grey card	2016-10-06	Pongumoodu	Melanitis leda	DSC_0025
PM359	grey card	2016-10-06	Pongumoodu	Melanitis leda	DSC_0023
PM369	grey card	2016-10-06	Pongumoodu	Melanitis leda	DSC_0011
PM394	grey card	2016-10-05	Pongumoodu	Melanitis leda	DSC_0161
PM395	grey card	2016-10-05	Pongumoodu	Melanitis leda	DSC_0160
PM398	grey card	2017-05-05	Pongumoodu	Melanitis leda	DSC_8004	DSC_8003
PM399	grey card	2017-05-05	Pongumoodu	Melanitis leda	DSC_8002	DSC_8001
PM400	grey card	2017-05-05	Pongumoodu	Melanitis leda	DSC_8000
PM401	grey card	2017-05-05	Pongumoodu	Melanitis leda	DSC_7999
PM410	grey card	2017-05-05	Pongumoodu	Melanitis leda	DSC_7975	DSC_7974-7973
PM411	grey card	2017-05-05	Pongumoodu	Melanitis leda	DSC_7969	DSC_7968-7967-7966
PM413	grey card	2017-05-05	Pongumoodu	Melanitis leda	DSC_7961	DSC_7960-7959-7958
PM422	grey card	2017-05-06	Pongumoodu	Melanitis leda	DSC_8060
PM426	grey card	2017-05-06	Pongumoodu	Melanitis leda	DSC_8048	DSC_8047
PM435	grey card	2017-05-06	Pongumoodu	Melanitis leda	DSC_8015
PM439	grey card	2017-08-08	Pongumoodu	Melanitis leda	DSC_9726
PM442	grey card	2017-08-08	Pongumoodu	Melanitis leda	DSC_9722
PM448	grey card	2017-08-08	Pongumoodu	Melanitis leda	DSC_9716
PM456	grey card	2017-08-08	Pongumoodu	Melanitis leda	DSC_9706
PM462	grey card	2017-08-08	Pongumoodu	Melanitis leda	DSC_9699
PM465	grey card	2017-08-08	Pongumoodu	Melanitis leda	DSC_9696
PM468	grey card	2017-08-08	Pongumoodu	Melanitis leda	DSC_9692
PM472	grey card	2017-08-08	Pongumoodu	Melanitis leda	DSC_9687
PM487	grey card	2017-07-11	Pongumoodu	Melanitis leda	DSC_9020
PM490	grey card	2017-07-11	Pongumoodu	Melanitis leda	DSC_9017
PM491	grey card	2017-07-11	Pongumoodu	Melanitis leda	DSC_9016
PM494	grey card	2017-07-11	Pongumoodu	Melanitis leda	DSC_9013
PM495	grey card	2017-07-11	Pongumoodu	Melanitis leda	DSC_9012
PM496	grey card	2017-07-11	Pongumoodu	Melanitis leda	DSC_9011
PM497	grey card	2017-07-11	Pongumoodu	Melanitis leda	DSC_9010
PM501	grey card	2017-07-11	Pongumoodu	Melanitis leda	DSC_9005
PM502	grey card	2017-07-11	Pongumoodu	Melanitis leda	DSC_9004
PM504	grey card	2017-07-11	Pongumoodu	Melanitis leda	DSC_9002
PM506	grey card	2017-07-11	Pongumoodu	Melanitis leda	DSC_9000
PM508	grey card	2017-07-11	Pongumoodu	Melanitis leda	DSC_8998
PM520	grey card	2017-07-11	Pongumoodu	Melanitis leda	DSC_8984
PM522	grey card	2017-07-11	Pongumoodu	Melanitis leda	DSC_8982
PM523	grey card	2017-07-11	Pongumoodu	Melanitis leda	DSC_8981
PM524	grey card	2017-07-11	Pongumoodu	Melanitis leda	DSC_8980
PM528	grey card	2017-07-11	Pongumoodu	Melanitis leda	DSC_8976
PM530	grey card	2017-07-11	Pongumoodu	Melanitis leda	DSC_8974
PM534	grey card	2017-07-11	Pongumoodu	Melanitis leda	DSC_8970
PM536	grey card	2017-07-11	Pongumoodu	Melanitis leda	DSC_8968
PM537	grey card	2017-07-11	Pongumoodu	Melanitis leda	DSC_8967
PM543	grey card	2017-07-11	Pongumoodu	Melanitis leda	DSC_8959
PM569	grey card	2017-07-11	Pongumoodu	Melanitis leda	DSC_8933
PM573	grey card	2017-07-11	Pongumoodu	Melanitis leda	DSC_8929
PM579	grey card	2017-07-11	Pongumoodu	Melanitis leda	DSC_8923
PM580	grey card	2017-07-11	Pongumoodu	Melanitis leda	DSC_8922
PM582	grey card	2017-07-11	Pongumoodu	Melanitis leda	DSC_8920
PM587	grey card	2017-07-11	Pongumoodu	Melanitis leda	DSC_8914
PM595	grey card	2017-07-11	Pongumoodu	Melanitis leda	DSC_8901	From DSC_8900 To DSC_8897
PM597	grey card	2017-07-11	Pongumoodu	Melanitis leda	DSC_8895
PM598	wild	2017-07-11	Pongumoodu	Melanitis leda	DSC_8894
PM599	wild	2017-07-11	Pongumoodu	Melanitis leda	DSC_8892	DSC_8891
PM614	grey card	2017-07-11	Pongumoodu	Melanitis leda	DSC_8876
PM615	grey card	2017-07-11	Pongumoodu	Melanitis leda	DSC_8875
PM617	grey card	2017-07-11	Pongumoodu	Melanitis leda	DSC_8873
PM618	grey card	2017-07-11	Pongumoodu	Melanitis leda	DSC_8872
PM619	grey card	2017-07-11	Pongumoodu	Melanitis leda	DSC_8871
PM620	grey card	2017-07-11	Pongumoodu	Melanitis leda	DSC_8870	DSC_8869
PM621	grey card	2017-07-11	Pongumoodu	Melanitis leda	DSC_8868
PM622	grey card	2017-07-11	Pongumoodu	Melanitis leda	DSC_8867
PM623	grey card	2017-07-11	Pongumoodu	Melanitis leda	DSC_8866
PM624	grey card	2017-07-11	Pongumoodu	Melanitis leda	DSC_8865
PM627	grey card	2017-07-11	Pongumoodu	Melanitis leda	DSC_8861
PM629	grey card	2017-07-11	Pongumoodu	Melanitis leda	DSC_8859
PM630	grey card	2017-07-11	Pongumoodu	Melanitis leda	DSC_8858
PM633	grey card	2017-07-11	Pongumoodu	Melanitis leda	DSC_8855
PM635	grey card	2017-07-11	Pongumoodu	Melanitis leda	DSC_8853
PM637	grey card	2017-07-11	Pongumoodu	Melanitis leda	DSC_8850
PM647	grey card	2017-07-11	Pongumoodu	Melanitis leda	DSC_8840
PM648	grey card	2017-07-11	Pongumoodu	Melanitis leda	DSC_8839
PM650	grey card	2017-07-11	Pongumoodu	Melanitis leda	DSC_8837
PM651	grey card	2017-07-11	Pongumoodu	Melanitis leda	DSC_8836
PM662	grey card	2017-07-11	Pongumoodu	Melanitis leda	DSC_8812
PM665	grey card	2017-07-11	Pongumoodu	Melanitis leda	DSC_8809
PM666	grey card	2017-07-11	Pongumoodu	Melanitis leda	DSC_8808
PM669	wild	2016-12-12	Pongumoodu	Melanitis leda	DSC_0215
PM670	wild	2016-12-12	Pongumoodu	Melanitis leda	DSC_0214
PM675	wild	2016-12-12	Pongumoodu	Melanitis leda	DSC_0207
PM677	wild	2016-06-19	Pongumoodu	Melanitis leda	leda dsf vegg.JPG
PM681	grey card	2016-06-19	Pongumoodu	Melanitis leda	DSC_4253	DSC_4252
PM683	grey card	2016-06-19	Pongumoodu	Melanitis leda	DSC_4249
PM684	wild	2016-06-19	Pongumoodu	Melanitis leda	DSC_4248
PM685	grey card	2016-06-19	Pongumoodu	Melanitis leda	DSC_4246
PM686	grey card	2016-06-19	Pongumoodu	Melanitis leda	DSC_4245
PM687	grey card	2016-06-19	Pongumoodu	Melanitis leda	DSC_4244
PM688	grey card	2016-06-19	Pongumoodu	Melanitis leda	DSC_4242
PM689	grey card	2016-06-19	Pongumoodu	Melanitis leda	DSC_4241
PM690	grey card	2016-06-19	Pongumoodu	Melanitis leda	DSC_4240
PM691	grey card	2016-06-19	Pongumoodu	Melanitis leda	DSC_4239	DSC_4238-4237
PM692	grey card	2016-06-19	Pongumoodu	Melanitis leda	DSC_4236	DSC_4235
PM693	grey card	2016-06-19	Pongumoodu	Melanitis leda	DSC_4234	DSC_4233
PM694	grey card	2016-06-19	Pongumoodu	Melanitis leda	DSC_4232	DSC_4231
PM695	grey card	2016-06-19	Pongumoodu	Melanitis leda	DSC_4230	DSC_4229-4228
PM696	grey card	2016-06-19	Pongumoodu	Melanitis leda	DSC_4227	DSC_4226
PM697	grey card	2016-06-19	Pongumoodu	Melanitis leda	DSC_4225	DSC_4224
PM698	grey card	2016-06-19	Pongumoodu	Melanitis leda	DSC_4223	DSC_4222
PM699	grey card	2016-06-19	Pongumoodu	Melanitis leda	DSC_4221	DSC_4220-DSC_4219
PM700	grey card	2016-06-19	Pongumoodu	Melanitis leda	DSC_4218	DSC_4217
PM701	grey card	2016-06-19	Pongumoodu	Melanitis leda	DSC_4216	DSC_4215
PM702	grey card	2016-06-19	Pongumoodu	Melanitis leda	DSC_4214	DSC_4213
PM703	grey card	2016-06-19	Pongumoodu	Melanitis leda	DSC_4212	DSC_4211
PM704	grey card	2016-06-19	Pongumoodu	Melanitis leda	DSC_4210	DSC_4209
PM705	grey card	2016-06-19	Pongumoodu	Melanitis leda	DSC_4208	DSC_4207-4206
PM707	grey card	2016-06-19	Pongumoodu	Melanitis leda	DSC_4203	DSC_4202-4201
PM709	grey card	2016-06-19	Pongumoodu	Melanitis leda	DSC_4191	DSC_4190-4189
PM710	grey card	2016-06-19	Pongumoodu	Melanitis leda	DSC_4188	DSC_4187-4186
PM711	grey card	2016-06-19	Pongumoodu	Melanitis leda	DSC_4185	DSC_4184
PM712	grey card	2016-06-19	Pongumoodu	Melanitis leda	DSC_4183	DSC_4182
PM713	grey card	2016-06-19	Pongumoodu	Melanitis leda	DSC_4180	DSC_4179
PM714	grey card	2016-06-19	Pongumoodu	Melanitis leda	DSC_4178	DSC_4177
PM715	grey card	2016-06-19	Pongumoodu	Melanitis leda	DSC_4176
PM716	grey card	2016-06-19	Pongumoodu	Melanitis leda	DSC_4172
PM717	grey card	2016-06-19	Pongumoodu	Melanitis leda	DSC_4171	DSC_4170
PM719	grey card	2016-06-19	Pongumoodu	Melanitis leda	DSC_4162	DSC_4161
PM720	grey card	2016-06-19	Pongumoodu	Melanitis leda	DSC_4150	DSC_4149
PM721	grey card	2016-06-19	Pongumoodu	Melanitis leda	DSC_4147	DSC_4146
PM722	grey card	2016-06-19	Pongumoodu	Melanitis leda	DSC_4145	DSC_4144-4143
PM725	grey card	2017-01-20	Pongumoodu	Melanitis leda	DSC_5914	DSC_5913
PM735	grey card	2017-01-20	Pongumoodu	Melanitis leda	DSC_5883
PM736	grey card	2017-01-20	Pongumoodu	Melanitis leda	DSC_5882
PM754	grey card	2016-06-20	Pongumoodu	Melanitis leda	DSC_4358
PM755	grey card	2016-06-20	Pongumoodu	Melanitis leda	DSC_4357
PM756	grey card	2016-06-20	Pongumoodu	Melanitis leda	DSC_4356
PM757	grey card	2016-06-20	Pongumoodu	Melanitis leda	DSC_4355
PM758	grey card	2016-06-20	Pongumoodu	Melanitis leda	DSC_4354
PM759	grey card	2016-06-20	Pongumoodu	Melanitis leda	DSC_4353
PM760	grey card	2016-06-20	Pongumoodu	Melanitis leda	DSC_4352
PM761	grey card	2016-06-20	Pongumoodu	Melanitis leda	DSC_4351
PM762	grey card	2016-06-20	Pongumoodu	Melanitis leda	DSC_4350
PM763	grey card	2016-06-20	Pongumoodu	Melanitis leda	DSC_4349
PM764	grey card	2016-06-20	Pongumoodu	Melanitis leda	DSC_4348
PM765	grey card	2016-06-20	Pongumoodu	Melanitis leda	DSC_4347
PM766	grey card	2016-06-20	Pongumoodu	Melanitis leda	DSC_4346
PM767	grey card	2016-06-20	Pongumoodu	Melanitis leda	DSC_4345
PM770	grey card	2016-06-20	Pongumoodu	Melanitis leda	DSC_4340
PM771	grey card	2016-06-20	Pongumoodu	Melanitis leda	DSC_4339
PM772	grey card	2016-06-20	Pongumoodu	Melanitis leda	DSC_4338
PM773	grey card	2016-06-20	Pongumoodu	Melanitis leda	DSC_4337
PM774	grey card	2016-06-20	Pongumoodu	Melanitis leda	DSC_4336	DSC_4335
PM775	grey card	2016-06-20	Pongumoodu	Melanitis leda	DSC_4334
PM776	grey card	2016-06-20	Pongumoodu	Melanitis leda	DSC_4333
PM777	grey card	2016-06-20	Pongumoodu	Melanitis leda	DSC_4332
PM778	grey card	2016-06-20	Pongumoodu	Melanitis leda	DSC_4331	DSC_4330
PM779	grey card	2016-06-20	Pongumoodu	Melanitis leda	DSC_4329
PM780	grey card	2016-06-20	Pongumoodu	Melanitis leda	DSC_4328
PM781	grey card	2016-06-20	Pongumoodu	Melanitis leda	DSC_4327
PM785	grey card	2016-06-20	Pongumoodu	Melanitis leda	DSC_4318
PM786	grey card	2016-06-20	Pongumoodu	Melanitis leda	DSC_4317
PM787	grey card	2016-06-20	Pongumoodu	Melanitis leda	DSC_4316
PM788	grey card	2016-06-20	Pongumoodu	Melanitis leda	DSC_4315
PM789	grey card	2016-06-20	Pongumoodu	Melanitis leda	DSC_4314
PM794	grey card	2016-06-20	Pongumoodu	Melanitis leda	DSC_4300
PM797	grey card	2016-06-20	Pongumoodu	Melanitis leda	DSC_4297
PM798	grey card	2016-06-20	Pongumoodu	Melanitis leda	DSC_4296
PM799	grey card	2016-06-20	Pongumoodu	Melanitis leda	DSC_4295	DSC_4294
PM800	grey card	2016-06-20	Pongumoodu	Melanitis leda	DSC_4293
PM813	grey card	2016-06-21	Pongumoodu	Melanitis leda	DSC_0067
PM814	grey card	2016-06-21	Pongumoodu	Melanitis leda	DSC_0066
PM815	grey card	2016-06-21	Pongumoodu	Melanitis leda	DSC_0065
PM816	grey card	2016-06-21	Pongumoodu	Melanitis leda	DSC_0064	DSC_0063
PM817	grey card	2016-06-21	Pongumoodu	Melanitis leda	DSC_0062
PM819	grey card	2016-06-21	Pongumoodu	Melanitis leda	DSC_0054
PM820	grey card	2016-06-21	Pongumoodu	Melanitis leda	DSC_0053
PM821	grey card	2016-06-21	Pongumoodu	Melanitis leda	DSC_0052
PM822	grey card	2016-06-21	Pongumoodu	Melanitis leda	DSC_0051
PM824	grey card	2016-06-21	Pongumoodu	Melanitis leda	DSC_0049
PM825	grey card	2016-06-21	Pongumoodu	Melanitis leda	DSC_0048
PM827	grey card	2016-06-21	Pongumoodu	Melanitis leda	DSC_0045
PM828	grey card	2016-06-21	Pongumoodu	Melanitis leda	DSC_0044
PM831	grey card	2016-06-21	Pongumoodu	Melanitis leda	DSC_0040
PM833	grey card	2016-06-21	Pongumoodu	Melanitis leda	DSC_0035
PM835	grey card	2016-06-21	Pongumoodu	Melanitis leda	DSC_0031	DSC_0030
PM837	grey card	2016-06-21	Pongumoodu	Melanitis leda	DSC_0028	DSC_0027
PM838	grey card	2016-06-21	Pongumoodu	Melanitis leda	DSC_0026
PM839	grey card	2016-06-21	Pongumoodu	Melanitis leda	DSC_0025
PM840	grey card	2016-06-21	Pongumoodu	Melanitis leda	DSC_0024
PM841	grey card	2016-06-21	Pongumoodu	Melanitis leda	DSC_0023
PM843	grey card	2016-06-21	Pongumoodu	Melanitis leda	DSC_0020	DSC_0019
PM845	grey card	2016-06-21	Pongumoodu	Melanitis leda	DSC_0017
PM861	grey card	2017-02-23	Pongumoodu	Melanitis leda	DSC_6705	DSC_6704
PM865	grey card	2017-02-23	Pongumoodu	Melanitis leda	DSC_6695
PM867	grey card	2017-02-23	Pongumoodu	Melanitis leda	DSC_6690	DSC_6689
PM869	grey card	2017-02-23	Pongumoodu	Melanitis leda	DSC_6684
PM873	grey card	2017-02-23	Pongumoodu	Melanitis leda	DSC_6678
PM880	grey card	2017-02-22	Pongumoodu	Melanitis leda	DSC_6666
PM882	grey card	2017-02-22	Pongumoodu	Melanitis leda	DSC_6663	DSC_6662
PM888	grey card	2017-02-22	Pongumoodu	Melanitis leda	DSC_6654
PM898	grey card	2017-02-22	Pongumoodu	Melanitis leda	DSC_6635
PM910	grey card	2017-02-22	Pongumoodu	Melanitis leda	DSC_6618
PM914	grey card	2017-02-22	Pongumoodu	Melanitis leda	DSC_6610
PM918	grey card	2016-06-22	Pongumoodu	Melanitis leda	DSC_0155
PM919	grey card	2016-06-22	Pongumoodu	Melanitis leda	DSC_0154
PM920	grey card	2016-06-22	Pongumoodu	Melanitis leda	DSC_0153
PM921	grey card	2016-06-22	Pongumoodu	Melanitis leda	DSC_0152
PM922	grey card	2016-06-22	Pongumoodu	Melanitis leda	DSC_0151
PM923	grey card	2016-06-22	Pongumoodu	Melanitis leda	DSC_0150
PM924	grey card	2016-06-22	Pongumoodu	Melanitis leda	DSC_0149
PM925	grey card	2016-06-22	Pongumoodu	Melanitis leda	DSC_0148
PM927	grey card	2016-06-22	Pongumoodu	Melanitis leda	DSC_0146
PM929	grey card	2016-06-22	Pongumoodu	Melanitis leda	DSC_0144
PM930	grey card	2016-06-22	Pongumoodu	Melanitis leda	DSC_0143
PM931	grey card	2016-06-22	Pongumoodu	Melanitis leda	DSC_0142
PM932	grey card	2016-06-22	Pongumoodu	Melanitis leda	DSC_0141
PM933	grey card	2016-06-22	Pongumoodu	Melanitis leda	DSC_0140
PM934	grey card	2016-06-22	Pongumoodu	Melanitis leda	DSC_0139
PM937	grey card	2016-06-22	Pongumoodu	Melanitis leda	DSC_0135
PM938	grey card	2016-06-22	Pongumoodu	Melanitis leda	DSC_0134
PM939	grey card	2016-06-22	Pongumoodu	Melanitis leda	DSC_0133
PM940	grey card	2016-06-22	Pongumoodu	Melanitis leda	DSC_0132
PM941	grey card	2016-06-22	Pongumoodu	Melanitis leda	DSC_0131
PM942	grey card	2016-06-22	Pongumoodu	Melanitis leda	DSC_0130
PM943	grey card	2016-06-22	Pongumoodu	Melanitis leda	DSC_0129
PM944	grey card	2016-06-22	Pongumoodu	Melanitis leda	DSC_0128
PM945	grey card	2016-06-22	Pongumoodu	Melanitis leda	DSC_0122
PM946	grey card	2016-06-22	Pongumoodu	Melanitis leda	DSC_0121
PM948	grey card	2016-06-22	Pongumoodu	Melanitis leda	DSC_0117
PM949	grey card	2016-06-22	Pongumoodu	Melanitis leda	DSC_0116
PM951	grey card	2016-06-22	Pongumoodu	Melanitis leda	DSC_0114	DSC_0113
PM952	grey card	2016-06-22	Pongumoodu	Melanitis leda	DSC_0112
PM953	grey card	2016-06-22	Pongumoodu	Melanitis leda	DSC_0111
PM954	grey card	2016-06-22	Pongumoodu	Melanitis leda	DSC_0110
PM955	grey card	2016-06-22	Pongumoodu	Melanitis leda	DSC_0109
PM960	grey card	2016-06-22	Pongumoodu	Melanitis leda	DSC_0104
PM961	grey card	2016-06-22	Pongumoodu	Melanitis leda	DSC_0103	DSC_0102
PM962	grey card	2016-06-22	Pongumoodu	Melanitis leda	DSC_0101
PM963	grey card	2016-06-22	Pongumoodu	Melanitis leda	DSC_0100	DSC_0099
PM964	grey card	2016-06-22	Pongumoodu	Melanitis leda	DSC_0098
PM965	grey card	2016-06-22	Pongumoodu	Melanitis leda	DSC_0097
PM966	grey card	2016-06-22	Pongumoodu	Melanitis leda	DSC_0096
PM967	grey card	2016-06-22	Pongumoodu	Melanitis leda	DSC_0095
PM968	grey card	2016-06-22	Pongumoodu	Melanitis leda	DSC_0094
PM969	grey card	2016-06-22	Pongumoodu	Melanitis leda	DSC_0093
PM970	grey card	2016-06-22	Pongumoodu	Melanitis leda	DSC_0092
PM971	grey card	2016-06-22	Pongumoodu	Melanitis leda	DSC_0091
PM972	grey card	2016-06-22	Pongumoodu	Melanitis leda	DSC_0090
PM973	grey card	2016-06-22	Pongumoodu	Melanitis leda	DSC_0089
PM974	grey card	2016-06-22	Pongumoodu	Melanitis leda	DSC_0088
PM980	grey card	2016-06-22	Pongumoodu	Melanitis leda	DSC_0079
PM981	grey card	2016-06-22	Pongumoodu	Melanitis leda	DSC_0078
PM983	grey card	2016-06-22	Pongumoodu	Melanitis leda	DSC_0076
PM984	grey card	2016-06-22	Pongumoodu	Melanitis leda	DSC_0075
PM992	grey card	2017-03-22	Pongumoodu	Melanitis leda	DSC_7199
PM1000	grey card	2016-11-22	Pongumoodu	Melanitis leda	DSC_0062
PM1002	grey card	2016-11-22	Pongumoodu	Melanitis leda	DSC_0060
PM1008	grey card	2016-11-22	Pongumoodu	Melanitis leda	DSC_0051
PM1009	grey card	2016-11-22	Pongumoodu	Melanitis leda	DSC_0050
PM1012	grey card	2016-11-22	Pongumoodu	Melanitis leda	DSC_0046
PM1013	grey card	2016-11-22	Pongumoodu	Melanitis leda	DSC_0045
PM1017	grey card	2016-11-22	Pongumoodu	Melanitis leda	DSC_0037
PM1018	wild	2016-11-22	Pongumoodu	Melanitis leda	DSC_0033	DSC_0031
PM1019	grey card	2016-11-22	Pongumoodu	Melanitis leda	DSC_0027
PM1023	grey card	2016-11-22	Pongumoodu	Melanitis leda	DSC_0023
PM1025	grey card	2016-11-22	Pongumoodu	Melanitis leda	DSC_0020
PM1028	grey card	2016-11-22	Pongumoodu	Melanitis leda	DSC_0017	DSC_0016
PM1030	grey card	2016-11-22	Pongumoodu	Melanitis leda	DSC_0013
PM1031	grey card	2016-11-22	Pongumoodu	Melanitis leda	DSC_0012
PM1035	grey card	2016-11-22	Pongumoodu	Melanitis leda	DSC_0005
PM1037	grey card	2016-11-22	Pongumoodu	Melanitis leda	DSC_0002
PM1038	grey card	2016-11-22	Pongumoodu	Melanitis leda	DSC_0001
PM1050	grey card	2017-03-23	Pongumoodu	Melanitis leda	DSC_7255	DSC_7254
PM1052	grey card	2017-03-23	Pongumoodu	Melanitis leda	DSC_7243	DSC_7242-DSC_7241
PM1060	grey card	2017-03-23	Pongumoodu	Melanitis leda	DSC_7223
PM1062	grey card	2017-03-23	Pongumoodu	Melanitis leda	DSC_0061
PM1063	wild	2016-11-23	Pongumoodu	Melanitis leda	leda wsf.JPG
PM1064	wild	2016-11-23	Pongumoodu	Melanitis leda	leda dsf_B.JPG
PM1065	wild	2016-11-23	Pongumoodu	Melanitis leda	leda dsf hidden3.JPG	leda dsf hidden2.JPG-leda dsf hidden.JPG-leda dsf hidden_close.JPG
PM1066	grey card	2016-11-23	Pongumoodu	Melanitis leda	DSC_0060
PM1074	grey card	2016-11-23	Pongumoodu	Melanitis leda	DSC_0051
PM1075	grey card	2016-11-23	Pongumoodu	Melanitis leda	DSC_0050
PM1076	grey card	2016-11-23	Pongumoodu	Melanitis leda	DSC_0049
PM1077	grey card	2016-11-23	Pongumoodu	Melanitis leda	DSC_0048
PM1078	grey card	2016-11-23	Pongumoodu	Melanitis leda	DSC_0047
PM1079	grey card	2016-11-23	Pongumoodu	Melanitis leda	DSC_0046
PM1080	grey card	2016-11-23	Pongumoodu	Melanitis leda	DSC_0045
PM1082	grey card	2016-11-23	Pongumoodu	Melanitis leda	DSC_0043
PM1084	grey card	2016-11-23	Pongumoodu	Melanitis leda	DSC_0040
PM1085	grey card	2016-11-23	Pongumoodu	Melanitis leda	DSC_0039
PM1086	grey card	2016-11-23	Pongumoodu	Melanitis leda	DSC_0038
PM1088	grey card	2016-11-23	Pongumoodu	Melanitis leda	DSC_0036
PM1091	grey card	2016-11-23	Pongumoodu	Melanitis leda	DSC_0031
PM1095	grey card	2016-11-23	Pongumoodu	Melanitis leda	DSC_0011
PM1097	grey card	2016-11-23	Pongumoodu	Melanitis leda	DSC_0009
PM1103	grey card	2017-03-24	Pongumoodu	Melanitis leda	DSC_7306
PM1134	grey card	2017-05-24	Pongumoodu	Melanitis leda	DSC_8468
PM1137	grey card	2017-05-24	Pongumoodu	Melanitis leda	DSC_8450	DSC_8449
PM1142	grey card	2018-01-25	Pongumoodu	Melanitis leda	DSC_1151	DSC_1150
PM1144	grey card	2018-01-25	Pongumoodu	Melanitis leda	DSC_1148
PM1145	grey card	2018-01-25	Pongumoodu	Melanitis leda	DSC_1147
PM1146	grey card	2018-01-25	Pongumoodu	Melanitis leda	DSC_1146
PM1147	grey card	2018-01-25	Pongumoodu	Melanitis leda	DSC_1145
PM1148	grey card	2018-01-25	Pongumoodu	Melanitis leda	DSC_1144
PM1149	grey card	2018-01-25	Pongumoodu	Melanitis leda	DSC_1143
PM1150	grey card	2018-01-25	Pongumoodu	Melanitis leda	DSC_1142
PM1151	grey card	2018-01-25	Pongumoodu	Melanitis leda	DSC_1141
PM1152	grey card	2018-01-25	Pongumoodu	Melanitis leda	DSC_1140
PM1153	grey card	2018-01-25	Pongumoodu	Melanitis leda	DSC_1139
PM1154	grey card	2018-01-25	Pongumoodu	Melanitis leda	DSC_1138
PM1155	grey card	2018-01-25	Pongumoodu	Melanitis leda	DSC_1137
PM1156	grey card	2018-01-25	Pongumoodu	Melanitis leda	DSC_1136
PM1157	grey card	2018-01-25	Pongumoodu	Melanitis leda	DSC_1135
PM1159	grey card	2018-01-25	Pongumoodu	Melanitis leda	DSC_1132
PM1160	grey card	2018-01-25	Pongumoodu	Melanitis leda	DSC_1131
PM1161	grey card	2018-01-25	Pongumoodu	Melanitis leda	DSC_1130
PM1162	grey card	2018-01-25	Pongumoodu	Melanitis leda	DSC_1129
PM1163	grey card	2018-01-25	Pongumoodu	Melanitis leda	DSC_1128
PM1164	grey card	2018-01-25	Pongumoodu	Melanitis leda	DSC_1127
PM1165	grey card	2018-01-25	Pongumoodu	Melanitis leda	DSC_1126
PM1166	grey card	2018-01-25	Pongumoodu	Melanitis leda	DSC_1125
PM1167	grey card	2018-01-25	Pongumoodu	Melanitis leda	DSC_1124
PM1168	grey card	2018-01-25	Pongumoodu	Melanitis leda	DSC_1123
PM1169	grey card	2018-01-25	Pongumoodu	Melanitis leda	DSC_1122
PM1170	grey card	2018-01-25	Pongumoodu	Melanitis leda	DSC_1121
PM1171	grey card	2018-01-25	Pongumoodu	Melanitis leda	DSC_1120
PM1172	grey card	2018-01-25	Pongumoodu	Melanitis leda	DSC_1119
PM1173	grey card	2018-01-25	Pongumoodu	Melanitis leda	DSC_1118
PM1174	grey card	2018-01-25	Pongumoodu	Melanitis leda	DSC_1117
PM1175	grey card	2018-01-25	Pongumoodu	Melanitis leda	DSC_1116
PM1176	grey card	2018-01-25	Pongumoodu	Melanitis leda	DSC_1115	DSC_1114
PM1178	grey card	2018-01-25	Pongumoodu	Melanitis leda	DSC_1112
PM1181	grey card	2018-01-25	Pongumoodu	Melanitis leda	DSC_1108
PM1183	grey card	2018-01-25	Pongumoodu	Melanitis leda	DSC_1106
PM1184	grey card	2018-01-25	Pongumoodu	Melanitis leda	DSC_1105
PM1185	grey card	2018-01-25	Pongumoodu	Melanitis leda	DSC_1104
PM1186	grey card	2018-01-25	Pongumoodu	Melanitis leda	DSC_1103
PM1187	grey card	2018-01-25	Pongumoodu	Melanitis leda	DSC_1102
PM1188	grey card	2018-01-25	Pongumoodu	Melanitis leda	DSC_1101	DSC_1100
PM1189	grey card	2018-01-25	Pongumoodu	Melanitis leda	DSC_1098
PM1190	grey card	2018-01-25	Pongumoodu	Melanitis leda	DSC_1097
PM1191	grey card	2018-01-25	Pongumoodu	Melanitis leda	DSC_1096
PM1192	grey card	2018-01-25	Pongumoodu	Melanitis leda	DSC_1095
PM1196	grey card	2018-01-25	Pongumoodu	Melanitis leda	DSC_1089
PM1197	grey card	2018-01-25	Pongumoodu	Melanitis leda	DSC_1088
PM1198	grey card	2018-01-25	Pongumoodu	Melanitis leda	DSC_1087
PM1199	grey card	2018-01-25	Pongumoodu	Melanitis leda	DSC_1086
PM1200	grey card	2018-01-25	Pongumoodu	Melanitis leda	DSC_1085
PM1201	grey card	2018-01-25	Pongumoodu	Melanitis leda	DSC_1084
PM1202	grey card	2018-01-25	Pongumoodu	Melanitis leda	DSC_1081
PM1204	grey card	2018-01-25	Pongumoodu	Melanitis leda	DSC_1079
PM1205	grey card	2018-01-25	Pongumoodu	Melanitis leda	DSC_1078
PM1206	grey card	2018-01-25	Pongumoodu	Melanitis leda	DSC_1077
PM1207	grey card	2018-01-25	Pongumoodu	Melanitis leda	DSC_1076
PM1208	grey card	2018-01-25	Pongumoodu	Melanitis leda	DSC_1075
PM1209	grey card	2018-01-25	Pongumoodu	Melanitis leda	DSC_1074
PM1210	grey card	2018-01-25	Pongumoodu	Melanitis leda	DSC_1073
PM1212	grey card	2018-01-25	Pongumoodu	Melanitis leda	DSC_1071
PM1213	grey card	2018-01-25	Pongumoodu	Melanitis leda	DSC_1070
PM1214	grey card	2018-01-25	Pongumoodu	Melanitis leda	DSC_1069
PM1215	grey card	2018-01-25	Pongumoodu	Melanitis leda	DSC_1068
PM1233	grey card	2017-05-25	Pongumoodu	Melanitis leda	DSC_8573
PM1260	grey card	2017-05-25	Pongumoodu	Melanitis leda	DSC_8525
PM1274	wild	2017-05-25	Pongumoodu	Melanitis leda	M leda dsf.JPG
PM1275	wild	2016-05-26	Pongumoodu	Melanitis leda	leda dsf hidden.JPG
PM1276	grey card	2016-05-26	Pongumoodu	Melanitis leda	DSC_0290
PM1286	grey card	2017-09-28	Pongumoodu	Melanitis leda	DSC_0267
PM1287	grey card	2017-09-28	Pongumoodu	Melanitis leda	DSC_0265
PM1288	grey card	2017-09-28	Pongumoodu	Melanitis leda	DSC_0264
PM1289	grey card	2017-09-28	Pongumoodu	Melanitis leda	DSC_0263
PM1290	grey card	2017-09-28	Pongumoodu	Melanitis leda	DSC_0262	DSC_0261
PM1291	grey card	2017-09-28	Pongumoodu	Melanitis leda	DSC_0260
PM1292	grey card	2017-09-28	Pongumoodu	Melanitis leda	DSC_0259	DSC_0258
PM1293	grey card	2017-09-28	Pongumoodu	Melanitis leda	DSC_0257
PM1294	grey card	2017-09-28	Pongumoodu	Melanitis leda	DSC_0256
PM1295	grey card	2017-09-28	Pongumoodu	Melanitis leda	DSC_0255
PM1302	grey card	2017-09-28	Pongumoodu	Melanitis leda	DSC_0242
PM1305	grey card	2017-09-28	Pongumoodu	Melanitis leda	DSC_0239
PM1312	grey card	2017-09-28	Pongumoodu	Melanitis leda	DSC_0230
PM1314	grey card	2017-09-28	Pongumoodu	Melanitis leda	DSC_0227
PM1316	grey card	2017-09-28	Pongumoodu	Melanitis leda	DSC_0225
PM1317	grey card	2017-09-28	Pongumoodu	Melanitis leda	DSC_0224
PM1318	grey card	2017-09-28	Pongumoodu	Melanitis leda	DSC_0223
PM1323	grey card	2017-09-28	Pongumoodu	Melanitis leda	DSC_0214
PM1325	grey card	2017-09-27	Pongumoodu	Melanitis leda	DSC_0212
PM1326	grey card	2017-09-27	Pongumoodu	Melanitis leda	DSC_0211	DSC_0210
PM1331	grey card	2017-09-27	Pongumoodu	Melanitis leda	DSC_0201	DSC_0200
PM1334	grey card	2017-09-27	Pongumoodu	Melanitis leda	DSC_0196
PM1336	grey card	2017-09-27	Pongumoodu	Melanitis leda	DSC_0194	DSC_0193
PM1337	grey card	2017-09-27	Pongumoodu	Melanitis leda	DSC_0192	DSC_0190
PM1342	grey card	2017-09-27	Pongumoodu	Melanitis leda	DSC_0183	DSC_0182
PM1343	grey card	2017-09-27	Pongumoodu	Melanitis leda	DSC_0180
PM1344	grey card	2017-09-27	Pongumoodu	Melanitis leda	DSC_0178
PM1346	grey card	2017-09-27	Pongumoodu	Melanitis leda	DSC_0175
PM1354	grey card	2017-09-27	Pongumoodu	Melanitis leda	DSC_0157
PM1358	grey card	2017-09-27	Pongumoodu	Melanitis leda	DSC_0152
PM1359	grey card	2017-09-27	Pongumoodu	Melanitis leda	DSC_0151
PM1361	grey card	2017-09-27	Pongumoodu	Melanitis leda	DSC_0147
PM1362	wild	2017-09-27	Pongumoodu	Melanitis leda	leda dsf hidden3.JPG	leda dsf hidden2.JPG-leda dsf hidden1.JPG
PM1363	grey card	2016-05-28	Pongumoodu	Melanitis leda	DSC_3944	DSC_3943
PM1364	grey card	2016-05-28	Pongumoodu	Melanitis leda	DSC_3934	DSC_3933
PM1368	wild	2016-05-29	Pongumoodu	Melanitis leda	DSC_3951
PM1370	grey card	2017-11-29	Pongumoodu	Melanitis leda	DSC_0410
PM1371	grey card	2017-11-29	Pongumoodu	Melanitis leda	DSC_0409
PM1372	grey card	2017-11-29	Pongumoodu	Melanitis leda	DSC_0408
PM1373	grey card	2017-11-29	Pongumoodu	Melanitis leda	DSC_0407
PM1374	grey card	2017-11-29	Pongumoodu	Melanitis leda	DSC_0406
PM1375	grey card	2017-11-29	Pongumoodu	Melanitis leda	DSC_0405
PM1380	grey card	2017-11-29	Pongumoodu	Melanitis leda	DSC_0397
PM1381	grey card	2017-11-29	Pongumoodu	Melanitis leda	DSC_0396
PM1382	grey card	2017-11-29	Pongumoodu	Melanitis leda	DSC_0395
PM1383	grey card	2017-11-29	Pongumoodu	Melanitis leda	DSC_0393
PM1385	grey card	2017-11-29	Pongumoodu	Melanitis leda	DSC_0391
PM1388	grey card	2017-11-29	Pongumoodu	Melanitis leda	DSC_0388	DSC_0387
PM1389	grey card	2017-11-29	Pongumoodu	Melanitis leda	DSC_0386
PM1392	grey card	2017-11-29	Pongumoodu	Melanitis leda	DSC_0382
PM1393	grey card	2017-11-29	Pongumoodu	Melanitis leda	DSC_0381
PM1394	grey card	2017-11-29	Pongumoodu	Melanitis leda	DSC_0380
PM1395	grey card	2017-11-29	Pongumoodu	Melanitis leda	DSC_0379
PM1396	grey card	2017-11-29	Pongumoodu	Melanitis leda	DSC_0378
PM1397	grey card	2017-11-29	Pongumoodu	Melanitis leda	DSC_0376
PM1402	grey card	2017-11-29	Pongumoodu	Melanitis leda	DSC_0371
PM1403	grey card	2017-11-29	Pongumoodu	Melanitis leda	DSC_0370
PM1404	grey card	2017-11-29	Pongumoodu	Melanitis leda	DSC_0369
PM1405	grey card	2017-11-29	Pongumoodu	Melanitis leda	DSC_0368
PM1407	grey card	2017-11-29	Pongumoodu	Melanitis leda	DSC_0364
PM1409	grey card	2017-11-29	Pongumoodu	Melanitis leda	DSC_0362
PM1410	grey card	2017-11-29	Pongumoodu	Melanitis leda	DSC_0361
PM1411	grey card	2017-11-29	Pongumoodu	Melanitis leda	DSC_0360
PM1412	grey card	2017-11-29	Pongumoodu	Melanitis leda	DSC_0358
PM1416	grey card	2017-11-29	Pongumoodu	Melanitis leda	DSC_0353
PM1417	grey card	2017-11-29	Pongumoodu	Melanitis leda	DSC_0352
PM1418	grey card	2017-11-29	Pongumoodu	Melanitis leda	DSC_0351
PM1419	grey card	2017-11-29	Pongumoodu	Melanitis leda	DSC_0350
PM1420	grey card	2017-11-29	Pongumoodu	Melanitis leda	DSC_0349
PM1421	grey card	2017-11-29	Pongumoodu	Melanitis leda	DSC_0348
PM1422	grey card	2017-11-29	Pongumoodu	Melanitis leda	DSC_0347
PM1423	grey card	2017-11-29	Pongumoodu	Melanitis leda	DSC_0346
PM1428	grey card	2017-11-29	Pongumoodu	Melanitis leda	DSC_0339
PM1430	grey card	2017-11-29	Pongumoodu	Melanitis leda	DSC_0337
PM1431	grey card	2017-11-29	Pongumoodu	Melanitis leda	DSC_0336
PM1433	grey card	2017-11-29	Pongumoodu	Melanitis leda	DSC_0333
PM1434	grey card	2017-11-29	Pongumoodu	Melanitis leda	DSC_0332
PM1435	grey card	2017-11-29	Pongumoodu	Melanitis leda	DSC_0331
PM1437	grey card	2017-11-29	Pongumoodu	Melanitis leda	DSC_0329
PM1438	grey card	2017-11-29	Pongumoodu	Melanitis leda	DSC_0328
PM1439	grey card	2017-11-29	Pongumoodu	Melanitis leda	DSC_0327
PM1440	grey card	2017-11-29	Pongumoodu	Melanitis leda	DSC_0326
PM1441	grey card	2017-11-29	Pongumoodu	Melanitis leda	DSC_0324
PM1442	grey card	2017-11-29	Pongumoodu	Melanitis leda	DSC_0322
PM1443	grey card	2017-11-29	Pongumoodu	Melanitis leda	DSC_0321
PM1444	grey card	2017-11-29	Pongumoodu	Melanitis leda	DSC_0320
PM1445	grey card	2017-11-29	Pongumoodu	Melanitis leda	DSC_0319
PM1446	grey card	2017-11-29	Pongumoodu	Melanitis leda	DSC_0318
PM1447	grey card	2017-11-29	Pongumoodu	Melanitis leda	DSC_0317
PM1448	grey card	2017-11-29	Pongumoodu	Melanitis leda	DSC_0316
PM1449	grey card	2017-11-29	Pongumoodu	Melanitis leda	DSC_0315
PM1450	grey card	2017-11-29	Pongumoodu	Melanitis leda	DSC_0314
PM1451	grey card	2017-11-29	Pongumoodu	Melanitis leda	DSC_0313
PM1452	grey card	2017-11-29	Pongumoodu	Melanitis leda	DSC_0312
PM1463	grey card	2017-01-31	Pongumoodu	Melanitis leda	DSC_6297
PM1464	grey card	2017-01-31	Pongumoodu	Melanitis leda	DSC_6296	DSC_6295
PM1465	grey card	2017-01-31	Pongumoodu	Melanitis leda	DSC_6293
PM1469	grey card	2017-01-31	Pongumoodu	Melanitis leda	DSC_6278
PM1484	grey card	2017-01-31	Pongumoodu	Melanitis leda	DSC_6258	DSC_6257-DSC_6255-DSC_6254
TP7	grey card	2017-02-03	Technopark	Melanitis leda	DSC_6452
TP15	grey card	2017-02-03	Technopark	Melanitis leda	DSC_6431
TP47	grey card	2017-03-07	Technopark	Melanitis leda	DSC_6757	DSC_6756
TP49	grey card	2017-03-07	Technopark	Melanitis leda	DSC_6743
TP55	grey card	2017-06-07	Technopark	Melanitis leda	DSC_8792
TP73	grey card	2017-06-07	Technopark	Melanitis leda	DSC_8765
TP77	grey card	2017-06-07	Technopark	Melanitis leda	DSC_8759
TP86	grey card	2017-06-07	Technopark	Melanitis leda	DSC_8740	DSC_8739
TP89	grey card	2017-06-07	Technopark	Melanitis leda	DSC_8736
TP85	grey card	2018-02-08	Technopark	Melanitis leda	DSC_1633
TP86	grey card	2018-02-08	Technopark	Melanitis leda	DSC_1632
TP87	grey card	2018-02-08	Technopark	Melanitis leda	DSC_1631
TP89	grey card	2018-02-08	Technopark	Melanitis leda	DSC_1629
TP90	grey card	2018-02-08	Technopark	Melanitis leda	DSC_1628
TP91	grey card	2018-02-08	Technopark	Melanitis leda	DSC_1627
TP92	grey card	2018-02-08	Technopark	Melanitis leda	DSC_1626
TP93	grey card	2018-02-08	Technopark	Melanitis leda	DSC_1625
TP99	grey card	2018-02-08	Technopark	Melanitis leda	DSC_1616
TP100	grey card	2018-02-08	Technopark	Melanitis leda	DSC_1615
TP101	grey card	2018-02-08	Technopark	Melanitis leda	DSC_1614
TP102	grey card	2018-02-08	Technopark	Melanitis leda	DSC_1613
TP103	grey card	2018-02-08	Technopark	Melanitis leda	DSC_1612
TP104	grey card	2018-02-08	Technopark	Melanitis leda	DSC_1611
TP105	grey card	2018-02-08	Technopark	Melanitis leda	DSC_1610
TP106	grey card	2018-02-08	Technopark	Melanitis leda	DSC_1609
TP107	grey card	2018-02-08	Technopark	Melanitis leda	DSC_1608
TP110	grey card	2018-02-08	Technopark	Melanitis leda	DSC_1603
TP111	grey card	2018-02-08	Technopark	Melanitis leda	DSC_1602
TP112	grey card	2018-02-08	Technopark	Melanitis leda	DSC_1601
TP113	grey card	2018-02-08	Technopark	Melanitis leda	DSC_1600
TP114	grey card	2018-02-08	Technopark	Melanitis leda	DSC_1599
TP115	grey card	2018-02-08	Technopark	Melanitis leda	DSC_1598	DSC_1597
TP117	grey card	2018-02-08	Technopark	Melanitis leda	DSC_1595	DSC_1594
TP118	grey card	2018-02-08	Technopark	Melanitis leda	DSC_1593
TP119	grey card	2018-02-08	Technopark	Melanitis leda	DSC_1592
TP120	grey card	2018-02-08	Technopark	Melanitis leda	DSC_1591
TP122	grey card	2018-02-08	Technopark	Melanitis leda	DSC_1589	DSC_1588
TP123	grey card	2018-02-08	Technopark	Melanitis leda	DSC_1587
TP125	grey card	2018-02-08	Technopark	Melanitis leda	DSC_1579
TP126	grey card	2018-02-08	Technopark	Melanitis leda	DSC_1578
TP127	grey card	2018-02-08	Technopark	Melanitis leda	DSC_1577
TP128	grey card	2018-02-08	Technopark	Melanitis leda	DSC_1576
TP129	grey card	2018-02-08	Technopark	Melanitis leda	DSC_1575
TP130	grey card	2018-02-08	Technopark	Melanitis leda	DSC_1574
TP131	grey card	2018-02-08	Technopark	Melanitis leda	DSC_1573
TP132	grey card	2018-02-08	Technopark	Melanitis leda	DSC_1572
TP133	grey card	2018-02-08	Technopark	Melanitis leda	DSC_1571
TP134	grey card	2018-02-08	Technopark	Melanitis leda	DSC_1570
TP135	grey card	2018-02-08	Technopark	Melanitis leda	DSC_1569
TP136	grey card	2018-02-08	Technopark	Melanitis leda	DSC_1568
TP137	grey card	2018-02-08	Technopark	Melanitis leda	DSC_1567
TP138	grey card	2018-02-08	Technopark	Melanitis leda	DSC_1566
TP139	grey card	2018-02-08	Technopark	Melanitis leda	DSC_1565
TP140	grey card	2018-02-08	Technopark	Melanitis leda	DSC_1564
TP141	grey card	2018-02-08	Technopark	Melanitis leda	DSC_1563
TP142	grey card	2018-02-08	Technopark	Melanitis leda	DSC_1562
TP143	grey card	2018-02-08	Technopark	Melanitis leda	DSC_1561
TP144	grey card	2018-02-08	Technopark	Melanitis leda	DSC_1560
TP145	grey card	2018-02-08	Technopark	Melanitis leda	DSC_1559
TP146	grey card	2018-02-08	Technopark	Melanitis leda	DSC_1558
TP147	grey card	2018-02-08	Technopark	Melanitis leda	DSC_1557	DSC_1556
TP148	grey card	2018-02-08	Technopark	Melanitis leda	DSC_1555
TP150	grey card	2018-02-08	Technopark	Melanitis leda	DSC_1552
TP151	grey card	2018-02-08	Technopark	Melanitis leda	DSC_1551
TP152	grey card	2018-02-08	Technopark	Melanitis leda	DSC_1550
TP153	grey card	2018-02-08	Technopark	Melanitis leda	DSC_1549
TP154	grey card	2018-02-08	Technopark	Melanitis leda	DSC_1548
TP155	grey card	2018-02-08	Technopark	Melanitis leda	DSC_1547
TP156	grey card	2018-02-08	Technopark	Melanitis leda	DSC_1546
TP157	grey card	2018-02-08	Technopark	Melanitis leda	DSC_1545	DSC_1544
TP158	grey card	2018-02-08	Technopark	Melanitis leda	DSC_1543
TP159	grey card	2018-02-08	Technopark	Melanitis leda	DSC_1542
TP160	grey card	2018-02-08	Technopark	Melanitis leda	DSC_1541
TP161	grey card	2018-02-08	Technopark	Melanitis leda	DSC_1540
TP162	grey card	2018-02-08	Technopark	Melanitis leda	DSC_1539
TP163	grey card	2018-02-08	Technopark	Melanitis leda	DSC_1538
TP164	grey card	2018-02-08	Technopark	Melanitis leda	DSC_1537
TP165	grey card	2018-02-08	Technopark	Melanitis leda	DSC_1536
TP166	grey card	2018-02-08	Technopark	Melanitis leda	DSC_1535
TP167	grey card	2018-02-08	Technopark	Melanitis leda	DSC_1534
TP168	grey card	2018-02-08	Technopark	Melanitis leda	DSC_1533	DSC_1532
TP169	grey card	2018-02-08	Technopark	Melanitis leda	DSC_1531
TP170	grey card	2018-02-08	Technopark	Melanitis leda	DSC_1530
TP171	grey card	2018-02-08	Technopark	Melanitis leda	DSC_1529
TP172	grey card	2018-02-08	Technopark	Melanitis leda	DSC_1528
TP173	grey card	2018-02-08	Technopark	Melanitis leda	DSC_1527
TP174	grey card	2018-02-08	Technopark	Melanitis leda	DSC_1526
TP175	grey card	2018-02-08	Technopark	Melanitis leda	DSC_1525
TP176	grey card	2018-02-08	Technopark	Melanitis leda	DSC_1524
TP177	grey card	2018-02-08	Technopark	Melanitis leda	DSC_1523
TP178	grey card	2018-02-08	Technopark	Melanitis leda	DSC_1522
TP179	grey card	2018-02-08	Technopark	Melanitis leda	DSC_1521	DSC_1520
TP180	grey card	2018-02-08	Technopark	Melanitis leda	DSC_1519	DSC_1518
TP181	grey card	2018-02-08	Technopark	Melanitis leda	DSC_1517
TP182	grey card	2018-02-08	Technopark	Melanitis leda	DSC_1516
TP183	grey card	2018-02-08	Technopark	Melanitis leda	DSC_1515
TP184	grey card	2018-02-08	Technopark	Melanitis leda	DSC_1514
TP185	grey card	2018-02-08	Technopark	Melanitis leda	DSC_1513	DSC_1512
TP186	grey card	2018-02-08	Technopark	Melanitis leda	DSC_1511
TP187	grey card	2018-02-08	Technopark	Melanitis leda	DSC_1510	DSC_1509
TP188	grey card	2018-02-08	Technopark	Melanitis leda	DSC_1508
TP189	grey card	2018-02-08	Technopark	Melanitis leda	DSC_1507
TP190	grey card	2018-02-08	Technopark	Melanitis leda	DSC_1506
TP191	grey card	2018-02-08	Technopark	Melanitis leda	DSC_1505	DSC_1504
TP192	grey card	2018-02-08	Technopark	Melanitis leda	DSC_1503
TP194	grey card	2018-02-08	Technopark	Melanitis leda	DSC_1499
TP195	grey card	2018-02-08	Technopark	Melanitis leda	DSC_1498
TP196	grey card	2018-02-08	Technopark	Melanitis leda	DSC_1497	DSC_1496
TP197	grey card	2018-02-08	Technopark	Melanitis leda	DSC_1495
TP198	grey card	2018-02-08	Technopark	Melanitis leda	DSC_1494
TP199	grey card	2018-02-08	Technopark	Melanitis leda	DSC_1493
TP200	grey card	2018-02-08	Technopark	Melanitis leda	DSC_1492
TP201	grey card	2018-02-08	Technopark	Melanitis leda	DSC_1491
TP202	grey card	2018-02-08	Technopark	Melanitis leda	DSC_1490
TP203	grey card	2018-02-08	Technopark	Melanitis leda	DSC_1489
TP204	grey card	2018-02-08	Technopark	Melanitis leda	DSC_1488
TP205	grey card	2018-02-08	Technopark	Melanitis leda	DSC_1487
TP206	grey card	2018-02-08	Technopark	Melanitis leda	DSC_1486	DSC_1485
TP207	grey card	2018-02-08	Technopark	Melanitis leda	DSC_1484
TP208	grey card	2018-02-08	Technopark	Melanitis leda	DSC_1483	DSC_1482-1481
TP209	grey card	2018-02-08	Technopark	Melanitis leda	DSC_1480	DSC_1479
TP210	grey card	2018-02-08	Technopark	Melanitis leda	DSC_1478
TP211	grey card	2018-02-08	Technopark	Melanitis leda	DSC_1477
TP212	grey card	2018-02-08	Technopark	Melanitis leda	DSC_1476	DSC_1475
TP213	grey card	2018-02-08	Technopark	Melanitis leda	DSC_1474
TP214	grey card	2018-02-08	Technopark	Melanitis leda	DSC_1473
TP215	grey card	2018-02-08	Technopark	Melanitis leda	DSC_1472
TP216	grey card	2018-02-08	Technopark	Melanitis leda	DSC_1471
TP217	grey card	2018-02-08	Technopark	Melanitis leda	DSC_1470
TP218	grey card	2018-02-08	Technopark	Melanitis leda	DSC_1469
TP219	grey card	2018-02-08	Technopark	Melanitis leda	DSC_1468
TP220	grey card	2018-02-08	Technopark	Melanitis leda	DSC_1467
TP221	grey card	2018-02-08	Technopark	Melanitis leda	DSC_1466
TP222	grey card	2018-02-08	Technopark	Melanitis leda	DSC_1465
TP223	grey card	2018-02-08	Technopark	Melanitis leda	DSC_1464
TP224	grey card	2018-02-08	Technopark	Melanitis leda	DSC_1463
TP225	grey card	2018-02-08	Technopark	Melanitis leda	DSC_1460
TP226	grey card	2018-02-08	Technopark	Melanitis leda	DSC_1459	DSC_1458
TP228	grey card	2018-02-08	Technopark	Melanitis leda	DSC_1456
TP229	grey card	2018-02-08	Technopark	Melanitis leda	DSC_1455
TP230	grey card	2018-02-08	Technopark	Melanitis leda	DSC_1454
TP231	grey card	2018-02-08	Technopark	Melanitis leda	DSC_1453
TP232	grey card	2018-02-08	Technopark	Melanitis leda	DSC_1452	DSC_1451
TP233	grey card	2018-02-08	Technopark	Melanitis leda	DSC_1450
TP234	grey card	2018-02-08	Technopark	Melanitis leda	DSC_1449
TP235	grey card	2018-02-08	Technopark	Melanitis leda	DSC_1448
TP236	grey card	2018-02-08	Technopark	Melanitis leda	DSC_1447
TP238	grey card	2018-02-08	Technopark	Melanitis leda	DSC_1445
TP239	grey card	2018-02-08	Technopark	Melanitis leda	DSC_1444	DSC_1443
TP240	grey card	2018-02-08	Technopark	Melanitis leda	DSC_1442
TP241	grey card	2018-02-08	Technopark	Melanitis leda	DSC_1441
TP243	grey card	2018-02-08	Technopark	Melanitis leda	DSC_1439
TP244	grey card	2018-02-08	Technopark	Melanitis leda	DSC_1438
TP245	grey card	2018-02-08	Technopark	Melanitis leda	DSC_1437	DSC_1436
TP246	grey card	2018-02-08	Technopark	Melanitis leda	DSC_1435	DSC_1434
TP247	grey card	2018-02-08	Technopark	Melanitis leda	DSC_1433
TP248	grey card	2018-02-08	Technopark	Melanitis leda	DSC_1432
TP249	grey card	2018-02-08	Technopark	Melanitis leda	DSC_1431	DSC_1430
TP250	grey card	2018-02-08	Technopark	Melanitis leda	DSC_1429
TP251	grey card	2018-02-08	Technopark	Melanitis leda	DSC_1428	DSC_1427
TP252	grey card	2018-02-08	Technopark	Melanitis leda	DSC_1426
TP253	grey card	2018-02-08	Technopark	Melanitis leda	DSC_1425
TP254	grey card	2018-02-08	Technopark	Melanitis leda	DSC_1424
TP255	grey card	2018-02-08	Technopark	Melanitis leda	DSC_1423
TP256	grey card	2018-02-08	Technopark	Melanitis leda	DSC_1422
TP257	grey card	2018-02-08	Technopark	Melanitis leda	DSC_1421
TP258	grey card	2018-02-08	Technopark	Melanitis leda	DSC_1420
TP259	grey card	2018-02-08	Technopark	Melanitis leda	DSC_1419
TP261	grey card	2018-02-08	Technopark	Melanitis leda	DSC_1417	DSC_1416
TP264	grey card	2018-02-08	Technopark	Melanitis leda	DSC_1410
TP265	grey card	2018-02-08	Technopark	Melanitis leda	DSC_1409	DSC_1408
TP266	grey card	2018-02-08	Technopark	Melanitis leda	DSC_1407
TP267	grey card	2018-02-08	Technopark	Melanitis leda	DSC_1406
TP268	grey card	2018-02-08	Technopark	Melanitis leda	DSC_1405
TP269	grey card	2018-02-08	Technopark	Melanitis leda	DSC_1404
TP270	grey card	2018-02-08	Technopark	Melanitis leda	DSC_1403
TP271	grey card	2018-02-08	Technopark	Melanitis leda	DSC_1402
TP272	grey card	2018-02-08	Technopark	Melanitis leda	DSC_1401	DSC_1400
TP273	grey card	2018-02-08	Technopark	Melanitis leda	DSC_1399
TP274	grey card	2018-02-08	Technopark	Melanitis leda	DSC_1398
TP276	grey card	2018-02-08	Technopark	Melanitis leda	DSC_1396
TP277	grey card	2018-02-08	Technopark	Melanitis leda	DSC_1395
TP278	grey card	2018-02-08	Technopark	Melanitis leda	DSC_1394
TP279	grey card	2018-02-08	Technopark	Melanitis leda	DSC_1393
TP280	grey card	2018-02-08	Technopark	Melanitis leda	DSC_1392
TP281	grey card	2018-02-08	Technopark	Melanitis leda	DSC_1391
TP282	grey card	2018-02-08	Technopark	Melanitis leda	DSC_1390
TP283	grey card	2018-02-08	Technopark	Melanitis leda	DSC_1389
TP284	grey card	2018-02-08	Technopark	Melanitis leda	DSC_1388
TP285	grey card	2018-02-08	Technopark	Melanitis leda	DSC_1387
TP286	grey card	2018-02-08	Technopark	Melanitis leda	DSC_1386
TP288	grey card	2018-02-08	Technopark	Melanitis leda	DSC_1383
TP289	grey card	2018-02-08	Technopark	Melanitis leda	DSC_1382
TP290	grey card	2018-02-08	Technopark	Melanitis leda	DSC_1381
TP291	grey card	2018-02-08	Technopark	Melanitis leda	DSC_1380
TP292	grey card	2018-02-08	Technopark	Melanitis leda	DSC_1379
TP293	grey card	2018-02-08	Technopark	Melanitis leda	DSC_1378
TP294	grey card	2018-02-08	Technopark	Melanitis leda	DSC_1377	DSC_1376
TP295	grey card	2018-02-08	Technopark	Melanitis leda	DSC_1372
TP296	grey card	2018-02-08	Technopark	Melanitis leda	DSC_1371
TP297	grey card	2018-02-08	Technopark	Melanitis leda	DSC_1370
TP300	grey card	2018-02-08	Technopark	Melanitis leda	DSC_1367
TP301	grey card	2018-02-08	Technopark	Melanitis leda	DSC_1366
TP303	grey card	2018-02-08	Technopark	Melanitis leda	DSC_1364
TP304	grey card	2018-02-08	Technopark	Melanitis leda	DSC_1363
TP306	grey card	2018-02-08	Technopark	Melanitis leda	DSC_1361
TP307	grey card	2018-02-08	Technopark	Melanitis leda	DSC_1360
TP308	grey card	2018-02-08	Technopark	Melanitis leda	DSC_1359
TP309	grey card	2018-02-08	Technopark	Melanitis leda	DSC_1358
TP310	grey card	2018-02-08	Technopark	Melanitis leda	DSC_1357
TP311	grey card	2018-02-08	Technopark	Melanitis leda	DSC_1356
TP312	grey card	2018-02-08	Technopark	Melanitis leda	DSC_1355
TP313	grey card	2018-02-08	Technopark	Melanitis leda	DSC_1354
TP314	grey card	2018-02-08	Technopark	Melanitis leda	DSC_1353
TP315	grey card	2018-02-08	Technopark	Melanitis leda	DSC_1352
TP316	grey card	2018-02-08	Technopark	Melanitis leda	DSC_1351
TP317	grey card	2018-02-08	Technopark	Melanitis leda	DSC_1350
TP318	grey card	2018-02-08	Technopark	Melanitis leda	DSC_1349
TP319	grey card	2018-02-08	Technopark	Melanitis leda	DSC_1348	DSC_1347
TP320	grey card	2018-02-08	Technopark	Melanitis leda	DSC_1346
TP321	grey card	2018-02-08	Technopark	Melanitis leda	DSC_1345
TP322	grey card	2018-02-08	Technopark	Melanitis leda	DSC_1344	DSC_1343
TP323	grey card	2018-02-08	Technopark	Melanitis leda	DSC_1342
TP324	grey card	2018-02-08	Technopark	Melanitis leda	DSC_1341
TP325	grey card	2018-02-08	Technopark	Melanitis leda	DSC_1340
TP327	grey card	2018-02-08	Technopark	Melanitis leda	DSC_1338
TP328	grey card	2018-02-08	Technopark	Melanitis leda	DSC_1337
TP329	grey card	2018-02-08	Technopark	Melanitis leda	DSC_1336
TP330	grey card	2018-02-08	Technopark	Melanitis leda	DSC_1335
TP331	grey card	2018-02-08	Technopark	Melanitis leda	DSC_1334
TP341	grey card	2018-02-08	Technopark	Melanitis leda	DSC_1321
TP342	grey card	2018-02-08	Technopark	Melanitis leda	DSC_1320
TP343	grey card	2018-02-08	Technopark	Melanitis leda	DSC_1319
TP344	grey card	2018-02-08	Technopark	Melanitis leda	DSC_1318
TP345	grey card	2018-02-08	Technopark	Melanitis leda	DSC_1317	DSC_1316
TP346	grey card	2018-02-08	Technopark	Melanitis leda	DSC_1315
TP347	grey card	2018-02-08	Technopark	Melanitis leda	DSC_1314
TP348	grey card	2018-02-08	Technopark	Melanitis leda	DSC_1313
TP349	grey card	2018-02-08	Technopark	Melanitis leda	DSC_1312
TP350	grey card	2018-02-08	Technopark	Melanitis leda	DSC_1311
TP351	grey card	2018-02-08	Technopark	Melanitis leda	DSC_1310
TP352	grey card	2018-02-08	Technopark	Melanitis leda	DSC_1309	DSC_1308
TP353	grey card	2018-02-08	Technopark	Melanitis leda	DSC_1307
TP354	grey card	2018-02-08	Technopark	Melanitis leda	DSC_1306
TP355	grey card	2018-02-08	Technopark	Melanitis leda	DSC_1305
TP356	grey card	2018-02-08	Technopark	Melanitis leda	DSC_1304
TP357	grey card	2018-02-08	Technopark	Melanitis leda	DSC_1303	DSC_1302
TP358	grey card	2018-02-08	Technopark	Melanitis leda	DSC_1301
TP359	grey card	2018-02-08	Technopark	Melanitis leda	DSC_1300
TP360	grey card	2018-02-08	Technopark	Melanitis leda	DSC_1299
TP361	grey card	2018-02-08	Technopark	Melanitis leda	DSC_1298
TP362	grey card	2018-02-08	Technopark	Melanitis leda	DSC_1297
TP363	grey card	2018-02-08	Technopark	Melanitis leda	DSC_1296
TP364	grey card	2018-02-08	Technopark	Melanitis leda	DSC_1295
TP365	grey card	2018-02-08	Technopark	Melanitis leda	DSC_1294
TP366	grey card	2018-02-08	Technopark	Melanitis leda	DSC_1293
TP367	grey card	2018-02-08	Technopark	Melanitis leda	DSC_1292	DSC_1291
TP368	grey card	2018-02-08	Technopark	Melanitis leda	DSC_1290
TP369	grey card	2018-02-08	Technopark	Melanitis leda	DSC_1288
TP370	grey card	2018-02-08	Technopark	Melanitis leda	DSC_1287
TP371	grey card	2018-02-08	Technopark	Melanitis leda	DSC_1286
TP372	grey card	2018-02-08	Technopark	Melanitis leda	DSC_1285
TP373	grey card	2018-02-08	Technopark	Melanitis leda	DSC_1284
TP374	grey card	2018-02-08	Technopark	Melanitis leda	DSC_1283
TP375	grey card	2018-02-08	Technopark	Melanitis leda	DSC_1282
TP376	grey card	2018-02-08	Technopark	Melanitis leda	DSC_1281	DSC_1280
TP377	grey card	2017-03-08	Technopark	Melanitis leda	DSC_6836
TP389	grey card	2017-03-08	Technopark	Melanitis leda	DSC_6814	DSC_6813-6812
TP401	grey card	2016-12-08	Technopark	Melanitis leda	DSC_0076
TP406	grey card	2016-12-08	Technopark	Melanitis leda	DSC_0060	DSC_0059
TP414	grey card	2016-12-08	Technopark	Melanitis leda	DSC_0029
TP415	grey card	2016-12-08	Technopark	Melanitis leda	DSC_0020
TP417	grey card	2016-12-08	Technopark	Melanitis leda	DSC_0018
TP418	grey card	2016-12-08	Technopark	Melanitis leda	DSC_0017
TP419	grey card	2016-12-08	Technopark	Melanitis leda	DSC_0016	DSC_0015-0014
TP421	grey card	2016-12-08	Technopark	Melanitis leda	DSC_0007	DSC_0006
TP422	grey card	2016-12-08	Technopark	Melanitis leda	DSC_0005	DSC_0004
TP423	grey card	2016-12-08	Technopark	Melanitis leda	DSC_0001
TP425	grey card	2017-03-09	Technopark	Melanitis leda	DSC_6879
TP427	grey card	2017-03-09	Technopark	Melanitis leda	DSC_6874
TP429	grey card	2017-03-09	Technopark	Melanitis leda	DSC_6867
TP438	grey card	2017-05-09	Technopark	Melanitis leda	DSC_8126
TP459	grey card	2016-12-09	Technopark	Melanitis leda	DSC_0172
TP469	grey card	2016-12-09	Technopark	Melanitis leda	DSC_0151
TP470	grey card	2016-12-09	Technopark	Melanitis leda	DSC_0145
TP472	grey card	2016-12-09	Technopark	Melanitis leda	DSC_0132
TP480	grey card	2016-12-09	Technopark	Melanitis leda	DSC_0103
TP481	grey card	2016-12-09	Technopark	Melanitis leda	DSC_0101
TP482	grey card	2016-12-09	Technopark	Melanitis leda	DSC_0100
TP489	grey card	2016-12-09	Technopark	Melanitis leda	DSC_0090
TP492	grey card	2016-12-09	Technopark	Melanitis leda	DSC_0077
TP494	grey card	2016-12-09	Technopark	Melanitis leda	DSC_0074
TP501	grey card	2016-12-09	Technopark	Melanitis leda	DSC_0057
TP518	grey card	2016-12-09	Technopark	Melanitis leda	DSC_0016
TP519	grey card	2016-12-09	Technopark	Melanitis leda	DSC_0015
TP563	grey card	2017-05-11	Technopark	Melanitis leda	DSC_8223
TP570	grey card	2017-04-12	Technopark	Melanitis leda	DSC_7541	DSC_7540
TP579	grey card	2016-11-14	Technopark	Melanitis leda	DSC_0294
TP582	grey card	2016-11-14	Technopark	Melanitis leda	DSC_0285
TP583	grey card	2016-11-14	Technopark	Melanitis leda	DSC_0283
TP585	grey card	2016-11-14	Technopark	Melanitis leda	DSC_0281
TP589	grey card	2016-11-14	Technopark	Melanitis leda	DSC_0276
TP591	grey card	2016-11-14	Technopark	Melanitis leda	DSC_0273
TP593	grey card	2016-11-14	Technopark	Melanitis leda	DSC_0269
TP594	wild	2016-11-15	Technopark	Melanitis leda	DSC_0053	From DSC_0052-0050
TP596	grey card	2016-11-15	Technopark	Melanitis leda	DSC_0048
TP598	grey card	2016-11-15	Technopark	Melanitis leda	DSC_0045
TP599	grey card	2016-11-15	Technopark	Melanitis leda	DSC_0044	DSC_0043
TP600	grey card	2016-11-15	Technopark	Melanitis leda	DSC_0040
TP601	grey card	2016-11-15	Technopark	Melanitis leda	DSC_0039	DSC_0038
TP602	grey card	2016-11-15	Technopark	Melanitis leda	DSC_0037
TP603	grey card	2016-11-15	Technopark	Melanitis leda	DSC_0036
TP605	grey card	2016-11-15	Technopark	Melanitis leda	DSC_0029	DSC_0028
TP607	grey card	2016-11-15	Technopark	Melanitis leda	DSC_0026
TP609	grey card	2016-11-15	Technopark	Melanitis leda	DSC_0022
TP610	grey card	2016-11-15	Technopark	Melanitis leda	DSC_0015
TP613	grey card	2016-11-15	Technopark	Melanitis leda	DSC_0006
TP615	wild	2016-11-15	Technopark	Melanitis leda	DSC_0001
TP623	grey card	2017-12-20	Technopark	Melanitis leda	DSC_0548
TP624	grey card	2017-12-20	Technopark	Melanitis leda	DSC_0547
TP628	grey card	2017-12-20	Technopark	Melanitis leda	DSC_0542
TP629	grey card	2017-12-20	Technopark	Melanitis leda	DSC_0541
TP630	grey card	2017-12-20	Technopark	Melanitis leda	DSC_0540
TP631	grey card	2017-12-20	Technopark	Melanitis leda	DSC_0539
TP632	grey card	2017-12-20	Technopark	Melanitis leda	DSC_0536
TP633	grey card	2017-12-20	Technopark	Melanitis leda	DSC_0535	DSC_0534
TP638	grey card	2017-12-20	Technopark	Melanitis leda	DSC_0528
TP643	grey card	2017-12-20	Technopark	Melanitis leda	DSC_0520
TP644	grey card	2017-12-20	Technopark	Melanitis leda	DSC_0519	DSC_0518
TP645	grey card	2017-12-20	Technopark	Melanitis leda	DSC_0517
TP646	grey card	2017-12-20	Technopark	Melanitis leda	DSC_0516
TP647	grey card	2017-12-20	Technopark	Melanitis leda	DSC_0513
TP648	grey card	2017-12-20	Technopark	Melanitis leda	DSC_0512
TP650	grey card	2017-12-20	Technopark	Melanitis leda	DSC_0510	DSC_0509
TP651	grey card	2017-12-20	Technopark	Melanitis leda	DSC_0508
TP652	grey card	2017-12-20	Technopark	Melanitis leda	DSC_0507
TP653	grey card	2017-12-20	Technopark	Melanitis leda	DSC_0506
TP663	grey card	2017-12-20	Technopark	Melanitis leda	DSC_0494
TP664	grey card	2017-12-20	Technopark	Melanitis leda	DSC_0493
TP665	grey card	2017-12-20	Technopark	Melanitis leda	DSC_0492
TP666	grey card	2017-12-20	Technopark	Melanitis leda	DSC_0491
TP673	grey card	2017-12-20	Technopark	Melanitis leda	DSC_0482
TP678	grey card	2017-12-20	Technopark	Melanitis leda	DSC_0475	DSC_0474
TP679	grey card	2017-12-20	Technopark	Melanitis leda	DSC_0473
TP682	grey card	2017-12-20	Technopark	Melanitis leda	DSC_0469
TP683	grey card	2017-12-20	Technopark	Melanitis leda	DSC_0468
TP684	grey card	2017-12-20	Technopark	Melanitis leda	DSC_0467
TP693	grey card	2017-12-20	Technopark	Melanitis leda	DSC_0454
TP694	grey card	2017-12-20	Technopark	Melanitis leda	DSC_0453
TP700	grey card	2017-12-20	Technopark	Melanitis leda	DSC_0447
TP701	grey card	2017-12-20	Technopark	Melanitis leda	DSC_0446
TP702	grey card	2017-12-20	Technopark	Melanitis leda	DSC_0445
TP703	grey card	2017-12-20	Technopark	Melanitis leda	DSC_0444
TP704	grey card	2017-12-20	Technopark	Melanitis leda	DSC_0443
TP705	grey card	2017-12-20	Technopark	Melanitis leda	DSC_0442
TP711	grey card	2017-12-20	Technopark	Melanitis leda	DSC_0434
TP712	grey card	2017-12-20	Technopark	Melanitis leda	DSC_0433
TP714	grey card	2017-12-20	Technopark	Melanitis leda	DSC_0431
TP715	grey card	2017-12-20	Technopark	Melanitis leda	DSC_0430
TP718	grey card	2017-12-20	Technopark	Melanitis leda	DSC_0427
TP719	grey card	2017-12-20	Technopark	Melanitis leda	DSC_0426
TP722	grey card	2017-12-20	Technopark	Melanitis leda	DSC_0421
TP723	grey card	2017-12-20	Technopark	Melanitis leda	DSC_0420
TP727	grey card	2017-12-20	Technopark	Melanitis leda	DSC_0415	DSC_0414
TP732	grey card	2017-12-21	Technopark	Melanitis leda	DSC_0669
TP733	grey card	2017-12-21	Technopark	Melanitis leda	DSC_0668
TP734	grey card	2017-12-21	Technopark	Melanitis leda	DSC_0667
TP735	grey card	2017-12-21	Technopark	Melanitis leda	DSC_0666
TP739	grey card	2017-12-21	Technopark	Melanitis leda	DSC_0662
TP741	grey card	2017-12-21	Technopark	Melanitis leda	DSC_0660
TP742	grey card	2017-12-21	Technopark	Melanitis leda	DSC_0659
TP746	grey card	2017-12-21	Technopark	Melanitis leda	DSC_0654
TP747	grey card	2017-12-21	Technopark	Melanitis leda	DSC_0653
TP748	grey card	2017-12-21	Technopark	Melanitis leda	DSC_0652
TP752	grey card	2017-12-21	Technopark	Melanitis leda	DSC_0647
TP757	grey card	2017-12-21	Technopark	Melanitis leda	DSC_0634
TP758	grey card	2017-12-21	Technopark	Melanitis leda	DSC_0633
TP759	grey card	2017-12-21	Technopark	Melanitis leda	DSC_0632
TP760	grey card	2017-12-21	Technopark	Melanitis leda	DSC_0631
TP761	grey card	2017-12-21	Technopark	Melanitis leda	DSC_0630
TP762	grey card	2017-12-21	Technopark	Melanitis leda	DSC_0629
TP763	grey card	2017-12-21	Technopark	Melanitis leda	DSC_0628
TP764	wild	2017-12-21	Technopark	Melanitis leda	DSC_0626	DSC_0625-DSC_0624
TP765	grey card	2017-12-21	Technopark	Melanitis leda	DSC_0623	DSC_0622
TP766	grey card	2017-12-21	Technopark	Melanitis leda	DSC_0621
TP767	grey card	2017-12-21	Technopark	Melanitis leda	DSC_0620
TP768	grey card	2017-12-21	Technopark	Melanitis leda	DSC_0619
TP769	grey card	2017-12-21	Technopark	Melanitis leda	DSC_0618
TP770	grey card	2017-12-21	Technopark	Melanitis leda	DSC_0617
TP771	grey card	2017-12-21	Technopark	Melanitis leda	DSC_0616
TP772	grey card	2017-12-21	Technopark	Melanitis leda	DSC_0615
TP773	wild	2017-12-21	Technopark	Melanitis leda	DSC_0613	DSC_0612-DSC_0611
TP782	grey card	2017-12-21	Technopark	Melanitis leda	DSC_0602
TP788	grey card	2017-12-21	Technopark	Melanitis leda	DSC_0595
TP789	grey card	2017-12-21	Technopark	Melanitis leda	DSC_0594
TP792	grey card	2017-12-21	Technopark	Melanitis leda	DSC_0591
TP796	grey card	2017-12-21	Technopark	Melanitis leda	DSC_0586
TP797	grey card	2017-12-21	Technopark	Melanitis leda	DSC_0585
TP798	grey card	2017-12-21	Technopark	Melanitis leda	DSC_0584
TP799	grey card	2017-12-21	Technopark	Melanitis leda	DSC_0583
TP800	grey card	2017-12-21	Technopark	Melanitis leda	DSC_0582
TP801	grey card	2017-12-21	Technopark	Melanitis leda	DSC_0581
TP802	grey card	2017-12-21	Technopark	Melanitis leda	DSC_0580
TP803	grey card	2017-12-21	Technopark	Melanitis leda	DSC_0579
TP804	grey card	2017-12-21	Technopark	Melanitis leda	DSC_0578
TP805	grey card	2017-12-21	Technopark	Melanitis leda	DSC_0577
TP806	grey card	2017-12-21	Technopark	Melanitis leda	DSC_0576
TP807	grey card	2017-12-21	Technopark	Melanitis leda	DSC_0575
TP808	grey card	2017-12-21	Technopark	Melanitis leda	DSC_0574
TP811	grey card	2017-12-21	Technopark	Melanitis leda	DSC_0571
TP812	grey card	2017-12-21	Technopark	Melanitis leda	DSC_0570
TP813	grey card	2017-12-21	Technopark	Melanitis leda	DSC_0569
TP814	grey card	2017-12-21	Technopark	Melanitis leda	DSC_0568
TP815	grey card	2017-12-21	Technopark	Melanitis leda	DSC_0567
TP817	grey card	2017-12-21	Technopark	Melanitis leda	DSC_0565
TP818	grey card	2017-12-21	Technopark	Melanitis leda	DSC_0564
TP819	grey card	2017-12-21	Technopark	Melanitis leda	DSC_0563
TP820	grey card	2017-12-21	Technopark	Melanitis leda	DSC_0562
TP822	grey card	2017-12-21	Technopark	Melanitis leda	DSC_0560
TP824	grey card	2017-12-21	Technopark	Melanitis leda	DSC_0558
TP828	grey card	2018-03-22	Technopark	Melanitis leda	DSC_2040
TP830	grey card	2018-03-22	Technopark	Melanitis leda	DSC_2038
TP831	grey card	2018-03-22	Technopark	Melanitis leda	DSC_2037
TP843	grey card	2018-03-22	Technopark	Melanitis leda	DSC_2022
TP844	grey card	2018-03-22	Technopark	Melanitis leda	DSC_2020
TP845	grey card	2018-03-22	Technopark	Melanitis leda	DSC_2019
TP846	grey card	2018-03-22	Technopark	Melanitis leda	DSC_2018
TP847	grey card	2018-03-22	Technopark	Melanitis leda	DSC_2017
TP848	grey card	2018-03-22	Technopark	Melanitis leda	DSC_2016
TP850	grey card	2018-03-22	Technopark	Melanitis leda	DSC_2014
TP851	grey card	2018-03-22	Technopark	Melanitis leda	DSC_2013
TP852	grey card	2018-03-22	Technopark	Melanitis leda	DSC_2012
TP853	grey card	2018-03-22	Technopark	Melanitis leda	DSC_2011
TP854	grey card	2018-03-22	Technopark	Melanitis leda	DSC_2010
TP857	grey card	2018-03-22	Technopark	Melanitis leda	DSC_2005
TP858	grey card	2018-03-22	Technopark	Melanitis leda	DSC_2004
TP859	grey card	2018-03-22	Technopark	Melanitis leda	DSC_2003
TP860	grey card	2018-03-22	Technopark	Melanitis leda	DSC_2002
TP869	grey card	2018-03-22	Technopark	Melanitis leda	DSC_1989
TP870	grey card	2018-03-22	Technopark	Melanitis leda	DSC_1988
TP880	grey card	2018-03-22	Technopark	Melanitis leda	DSC_1971
TP883	grey card	2018-03-22	Technopark	Melanitis leda	DSC_1967
TP884	grey card	2018-03-22	Technopark	Melanitis leda	DSC_1966
TP885	grey card	2018-03-22	Technopark	Melanitis leda	DSC_1965
TP886	grey card	2018-03-22	Technopark	Melanitis leda	DSC_1964
TP889	grey card	2018-03-22	Technopark	Melanitis leda	DSC_1960
TP890	grey card	2018-03-22	Technopark	Melanitis leda	DSC_1959
TP894	grey card	2018-03-22	Technopark	Melanitis leda	DSC_1955
TP895	grey card	2018-03-22	Technopark	Melanitis leda	DSC_1954
TP896	grey card	2018-03-22	Technopark	Melanitis leda	DSC_1953
TP897	grey card	2018-03-22	Technopark	Melanitis leda	DSC_1952
TP898	grey card	2018-03-22	Technopark	Melanitis leda	DSC_1951	DSC_1950
TP939	grey card	2017-01-24	Technopark	Melanitis leda	DSC_5998	DSC_5997
TP956	grey card	2017-07-24	Technopark	Melanitis leda	DSC_9448
TP958	grey card	2017-07-24	Technopark	Melanitis leda	DSC_9446
TP959	grey card	2017-07-24	Technopark	Melanitis leda	DSC_9445
TP962	grey card	2017-07-24	Technopark	Melanitis leda	DSC_9441
TP963	grey card	2017-07-24	Technopark	Melanitis leda	DSC_9440
TP972	grey card	2017-07-24	Technopark	Melanitis leda	DSC_9429
TP973	grey card	2017-07-24	Technopark	Melanitis leda	DSC_9428	DSC_9427
TP974	grey card	2017-07-24	Technopark	Melanitis leda	DSC_9426
TP975	grey card	2017-07-24	Technopark	Melanitis leda	DSC_9425
TP976	grey card	2017-07-24	Technopark	Melanitis leda	DSC_9424
TP983	grey card	2017-07-24	Technopark	Melanitis leda	DSC_9407
TP985	grey card	2017-07-24	Technopark	Melanitis leda	DSC_9405
TP986	grey card	2017-07-24	Technopark	Melanitis leda	DSC_9404
TP988	grey card	2017-07-24	Technopark	Melanitis leda	DSC_9402
TP990	grey card	2017-07-24	Technopark	Melanitis leda	DSC_9400
TP991	grey card	2017-07-24	Technopark	Melanitis leda	DSC_9399
TP992	grey card	2017-07-24	Technopark	Melanitis leda	DSC_9398
TP993	grey card	2017-07-24	Technopark	Melanitis leda	DSC_9397
TP996	grey card	2017-07-24	Technopark	Melanitis leda	DSC_9393
TP997	grey card	2017-07-24	Technopark	Melanitis leda	DSC_9392
TP998	grey card	2017-07-24	Technopark	Melanitis leda	DSC_9391
TP1000	grey card	2017-07-24	Technopark	Melanitis leda	DSC_9388
TP1002	grey card	2017-07-24	Technopark	Melanitis leda	DSC_9385
[truncated: 1,869 more rows]

## Sheet: readme
This is a data sheet for recording results of butterfly monitoring. Some example data are filled in
The sheet 'data' will contain the main data at the level of indiviual butterflies.
Individual code	Each photo gets a unique code from you
Date	Date the picture was taken This is partly in the folder name and also saved with the file information
Region	There are all in Kerala (unless we add GOA and those from tamil Nadu)
Transect	given in folder names
Trap	usually not recorded here
Individual code	Unique Id for each individual
Background	Whether it was photographed against a grey card or something else
Date	Date the photo was taken
Site	Site the photo was taken
Species	species name
Photo	file name of photo
ExtraPhoto	file names of addiional photos of the same specimen
comments	comments
						Charaxes solon

## Sheet: SpeciesInfo
Species	CommonName	SeasonalForms	FruitFeeding
Acraea terpsicore	tawny coster	no	no
Amathusia travancorica	Travancore palmking	no	yes
Ariadne ariadne	angled castor	yes	yes
Ariadne merione	common castor	yes	yes
Castalius rosimon	common pierrot	no	no
Charaxes bernardus	tawny rajah	no	yes
Charaxes solon	black rajah	no	yes
Elymnias caudata	palmfly	no	yes
Euthalia aconthea	common baron	no	yes
Euthalia lubentina	gaudy baron	no	yes
Hypolimnas bolina	great eggfly	no	yes
Hypolimnas misippus	danaid eggfly	no	no
Jamides celeno	common cerulean	no	no
Junonia atlites	grey pansy	yes	yes
Junonia iphita	chocolate pansy	yes	yes
Junonia lemonias	lemon pansy	yes	yes
Kaniska canace	blue admiral	no	yes
Lambrix salsala	chestnut bob	no	no
Lethe drypetis	Tamil treebrown	no	yes
Lethe europa	bamboo treebrown	no	yes
Lethe rohria	common treebrown	no	yes
Loxura atymnus	yamfly	no	no
Lycaenidae	blues	no	no
Melanitis leda	common evening brown	yes	yes
Melanitis phedima	dark evening brown	no	yes
Melanitis zitenius	great evening brown	yes	yes
Moduza procris	commander	no	yes
moth	moth	no	yes
Mycalesis anaxias	white-bar bushbrown	yes	yes
Mycalesis mineus	dark-branded bushbrown	yes	yes
Mycalesis patnia	gladeye bushbrown	no	yes
Neptis hylas	common sailer	no	no
Orsotriaena medus	medus bushbrown	yes	yes
Pachliopta aristolochiae	common rose	no	no
Papilio polytes	common mormon	no	no
Parantirrhoea marshalli	travancore evening brown	no	yes
Parthenos sylvia	clipper	no	yes
Polyura athamas	common nawab	no	yes
skipper	skipper	no	no
Tanaecia lepidea	grey count	no	yes
Ypthima baldus	common five-ring	yes	no
Ypthima huebneri	common four-ring	yes	no
Zipaetis saitis	Tamil catseye	no	yes
